# Supplementary material for: Automated syndrome diagnosis by three-dimensional facial imaging
Source: PubMed Central journal article supplement (PMC7521994; doi:10.1038/s41436-020-0845-y), 2020-06-01
Supplement: 41436_2020_845_MOESM1_ESM.pdf [file 41436_2020_845_MOESM1_ESM.pdf]

## Supplemental Data

### 1) *Figures*

**Figure S1:** Figure S1: 3D image of the same subject as obtained by a 3dMD photogrammetry system and an iPhone X. A shows a 3dMD mesh and B shows the rendered 3D surface for the same subject obtained from an iPhone X 3D image. This subject has a beard which is much less apparent on the iPhone X image.

**Figure S2:** 3D landmark set used in the analysis.

**Figure S3:** Results for the unsymmetrized, symmetrized and combined symmetric and asymmetric components using parametric (CVA) classification. Here, the asymmetric component is the full set of deviations from symmetry re-centered on the sample mean.

**Figure S4:** Comparison of classification accuracy by machine-learning method.

**Figure S5:** Comparison of HDRDA validation by LOOCV and 20-fold CV.

**Figure S6:** Three-dimensional morphs showing the effect for each syndrome compared to the mean shape for unaffecteds. The shape effects shown are 2x the average magnitude to accentuate the anatomical distribution of the differences. The heatmaps show the regions of greatest difference. Blue means that the syndromic mesh is smaller (the surface is behind) and red means that the syndromic mesh is larger (the surface projects beyond).

**Figure S7:** Syndrome classification by Canonical Variates Analysis (CVA). (A) Classification accuracy by syndrome. For each syndrome, the graph shows the

proportion of syndromes for which the correct diagnosis is the top choice, in the top three, and in the top 10. B) Rankings of correct classifications using HDRDA. A) Counts and proportions for how often the true diagnosis is among the 10 highest ranked diagnoses for the full classification sample that included both syndromic subjects and unrelated, unaffected subjects, and partitioning the true diagnosis ranks as syndromic and unrelated, unaffected subjects.

**Figure S8:** Matrix of classification probabilities for HDRDA. The results are shown as a heatmap ranging from white (0) to red (1.0). The values that correspond to this plot are provided in File S3. These results show that the highest average classification probability is to the correct syndrome in every case, while the most common misclassifications are to unaffected.

**Figure S9:** Simulation results for classification tasks with different numbers of syndromes. In each iteration, a group of syndromes ( $n = 2$  to 50) was selected at random from the 65 syndromes included in the main classification analysis. These samples were then subjected to parametric (CVA) classification with cross-validation. The y axis shows the proportion of subjects classified to the correct syndrome and the x axis is the number of syndromes included in the classification task for that iteration.

## 2) *Tables*

**Table S1:** List of patient meetings attended.

**Table S2:** Race and ethnicity composition of study with comparison to US Census

**Table S3:** Shape variance attributable to age, sex and race by group

**Table S4:** Shape variation attributable to syndrome

**Table S5:** Unweighted average sensitivities across syndromes

**Table S6:** Analysis of incorrect classification. For each syndrome, this table shows the most common classification errors made by the parametric and HDRDA methods when the correct syndrome was not the top ranked classification. The last column of the table lists the syndrome that is most phenotypically similar (in terms of facial shape) to the correct syndrome.

**Table S7:** Confusion matrix summaries for HDRDA classification both when including and excluding unrelated unaffected as a class.

### 3) Files

**File S1:** Full list of syndromes included in the database

**File S2:** Analysis of sampling issues with leave-one-out versus k-fold validation.

**File S3:** Mis-classification plots for all syndromes

**File S4-11:** Movies of syndromic effects ordered along among-syndrome PCs.

al

**Figure S1:** 3D image of the same subject as obtained by a 3dMD photogrammetry system and an iPhone X. A shows a 3dMD mesh while B shows the rendered 3D surface for the same subject as obtained from an iPhone X 3D image. This subject has a beard which is much less apparent on the iPhone X image.

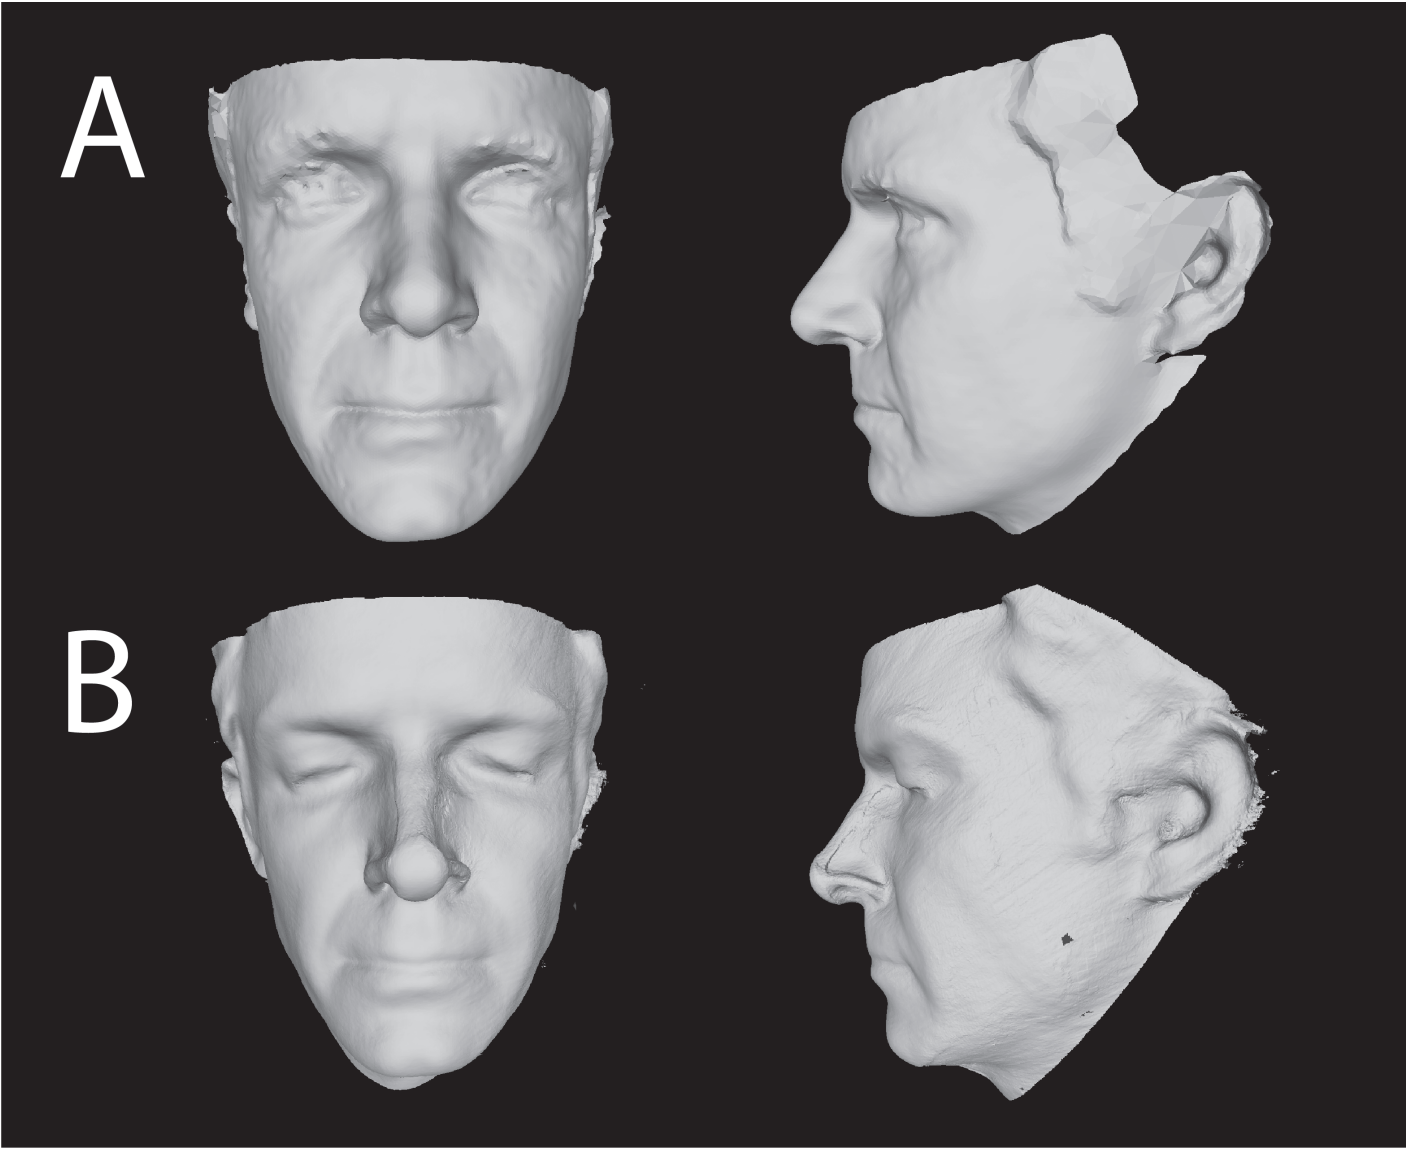

**Figure S2:** 3D landmark set used in analysis.

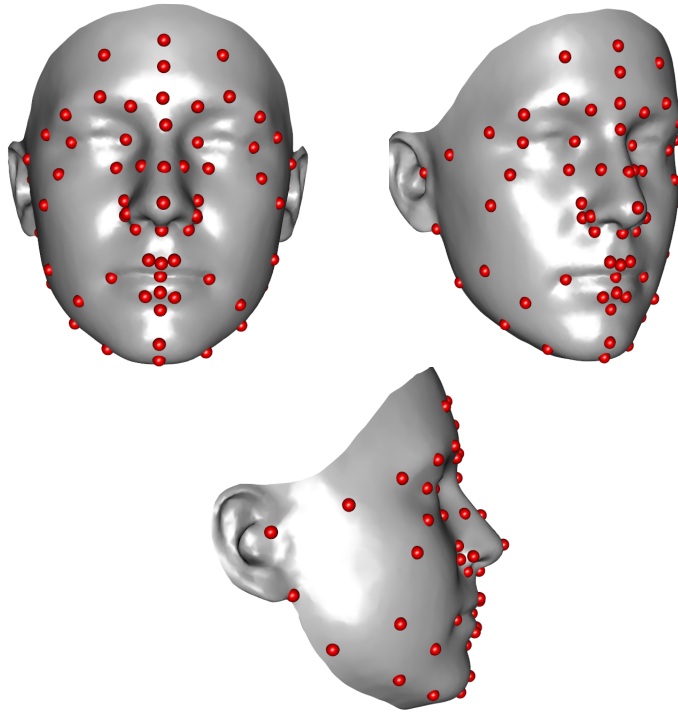

**Figure S3:** Results for the unsymmetrized, symmetrized and combined symmetric and asymmetric components using parametric (CVA) classification. Here, the asymmetric component is the full set of deviations from symmetry re-centered on the sample mean.

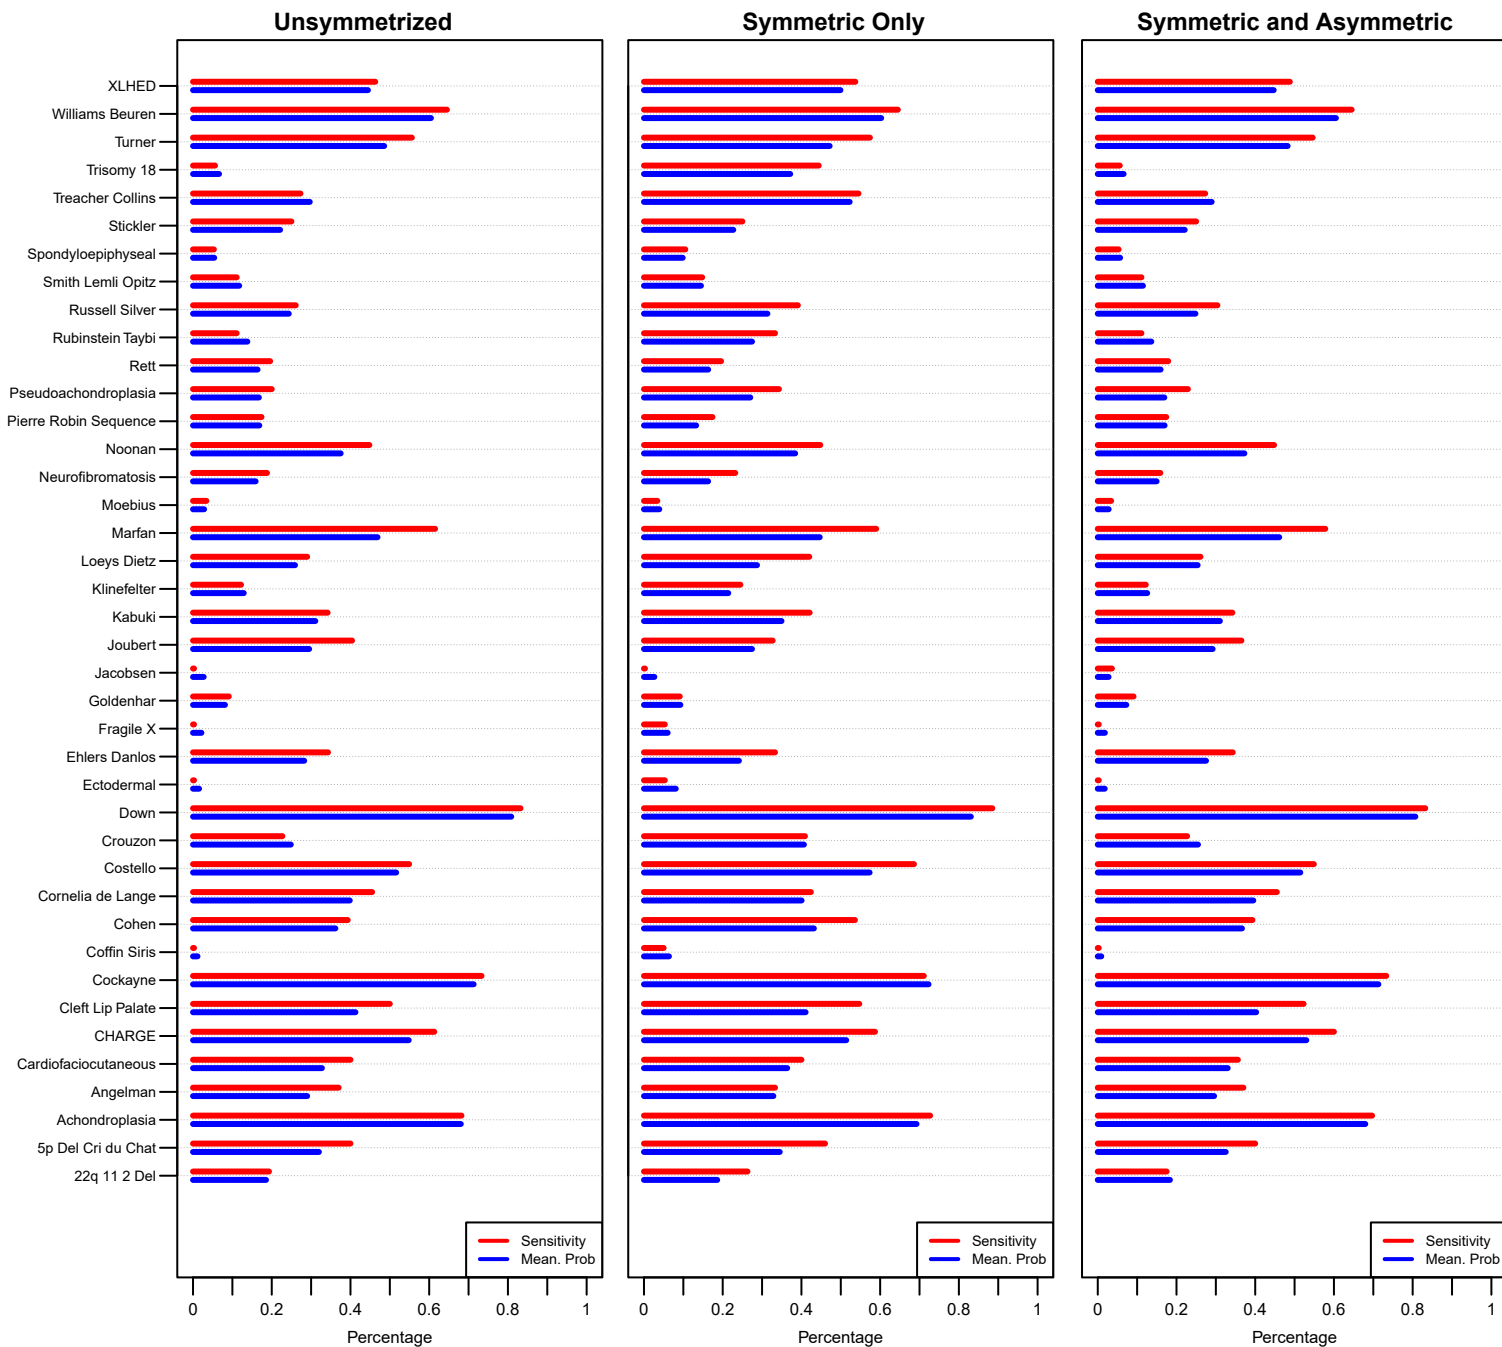



**Figure S5: HDRDA Validation by LOOCV and 20-fold CV**

A) Leave one out versus 20 fold cross-validation by sample size

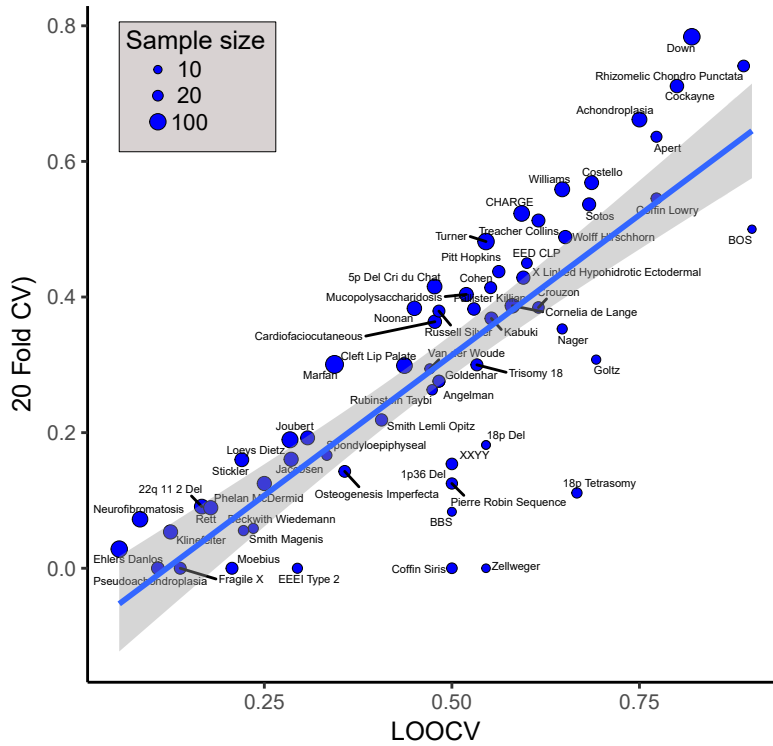

B) Leave one out versus 20 fold cross-validation by Severity

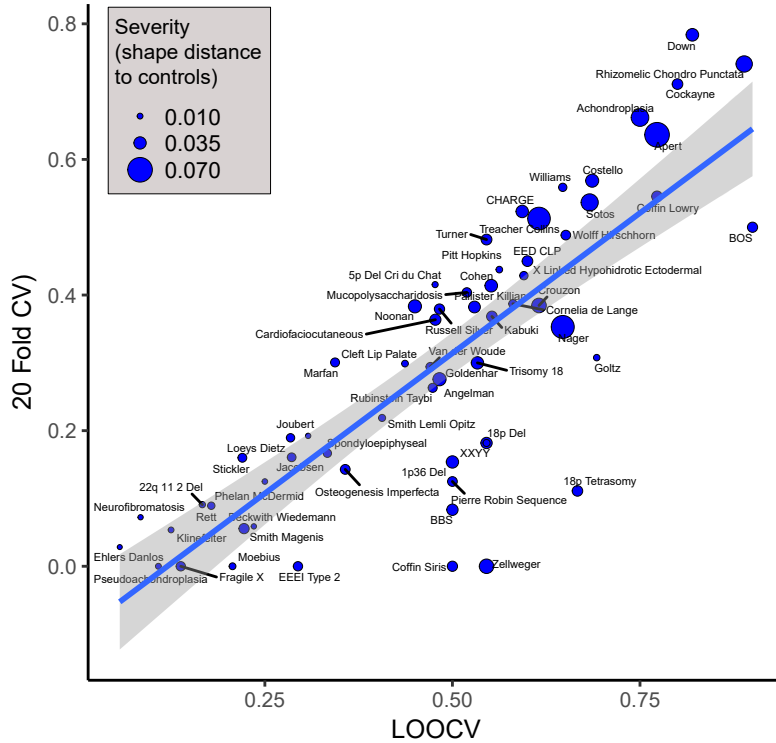



**Figure S6: Average shape effects by syndrome**

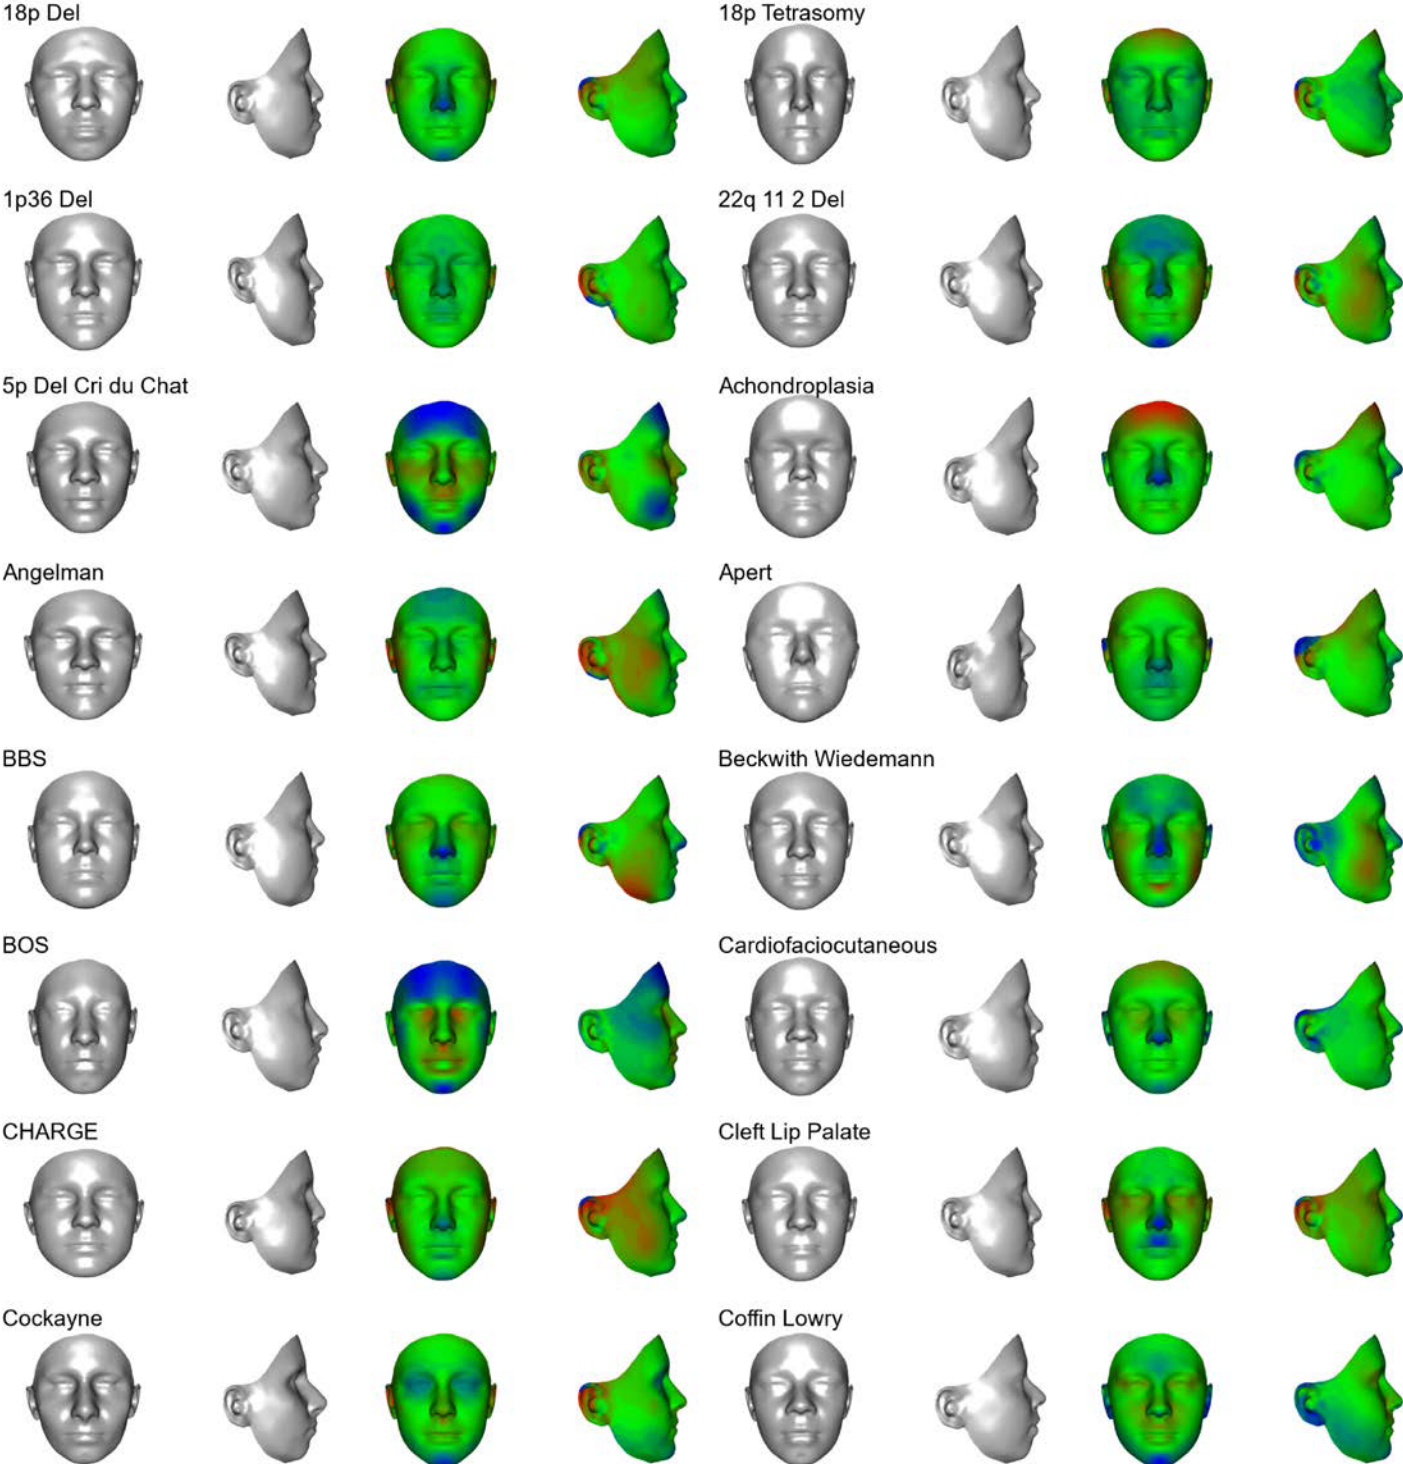

Coffin Siris

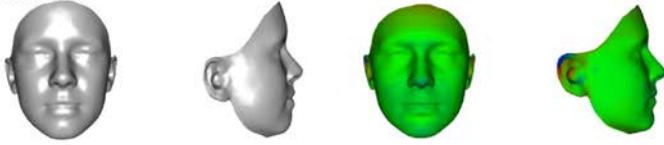

Cohen

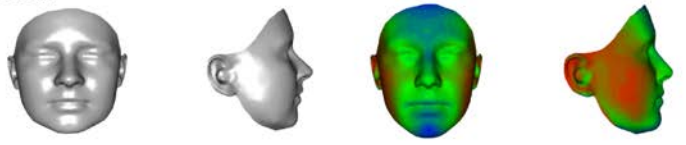

Cornelia de Lange

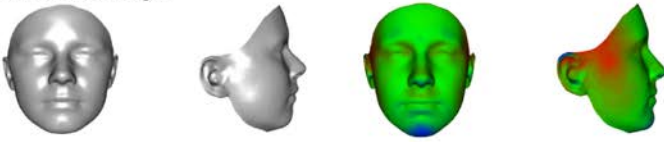

Costello

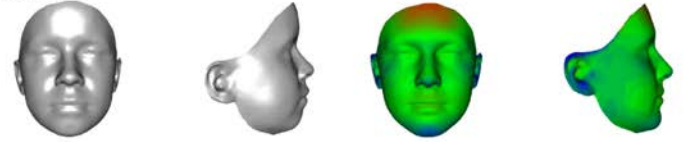

Crouzon

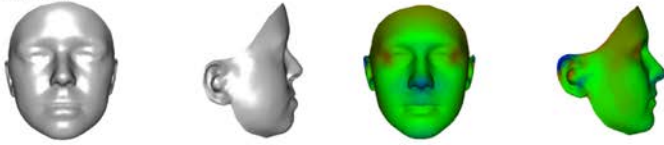

Down

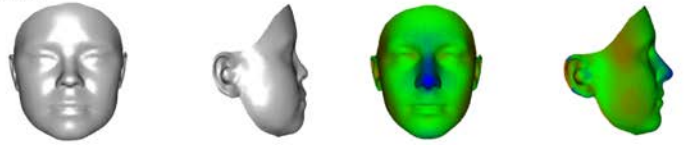

EED CLP

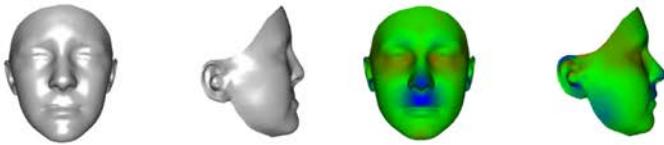

EEEI Type 2

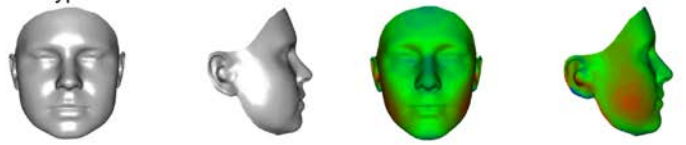

Ehlers Danlos

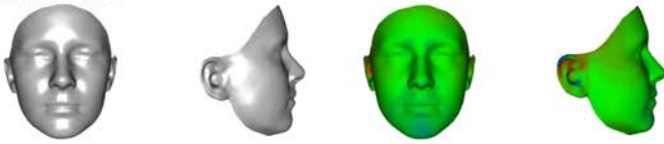

Fragile X

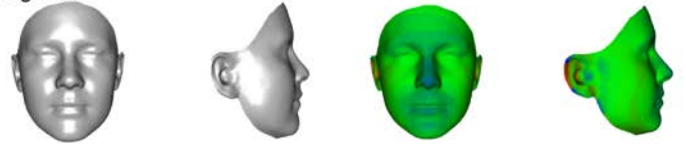

Goldenhar

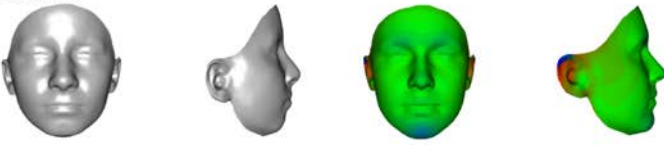

Goltz

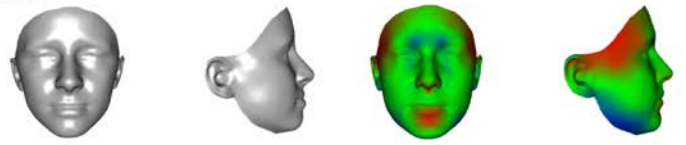

Jacobsen

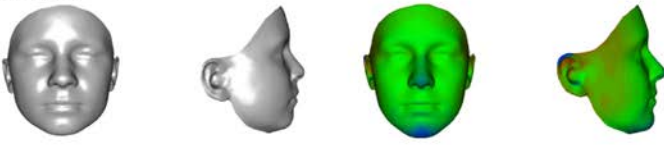

Joubert

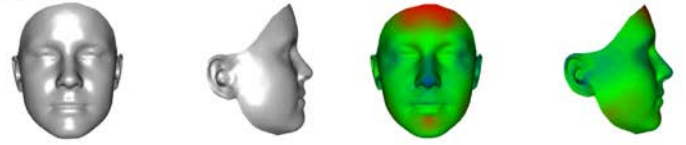

Kabuki

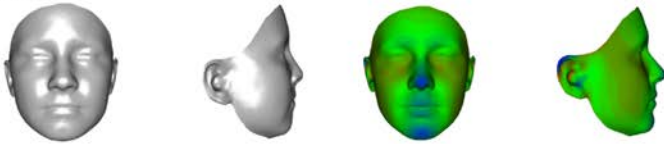

Klinefelter

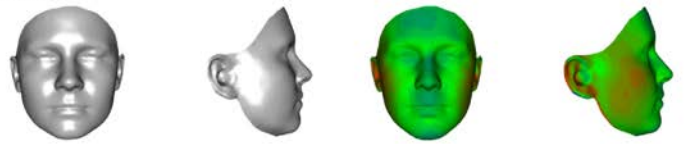

Loeys Dietz

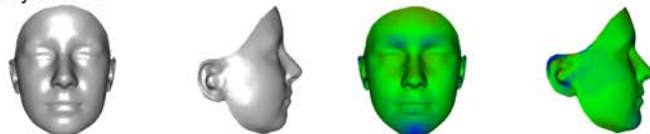

Marfan

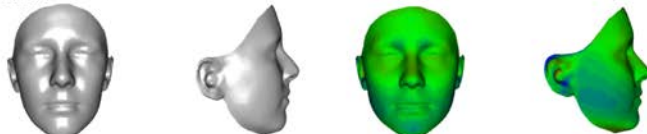

Moebius

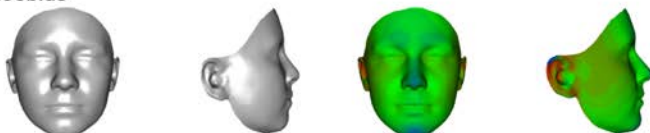

Mucopolysaccharidosis

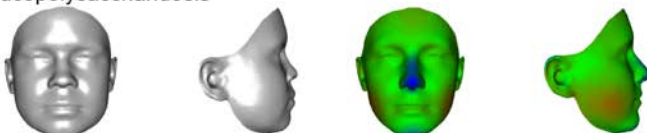

Nager

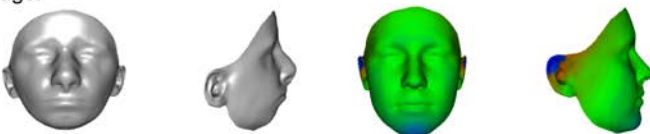

Neurofibromatosis

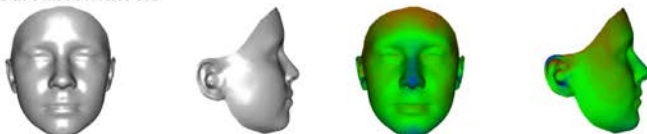

Noonan

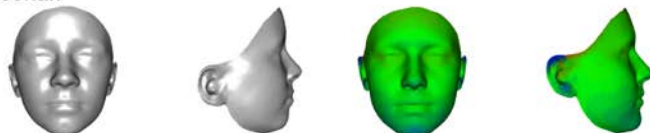

Osteogenesis Imperfecta

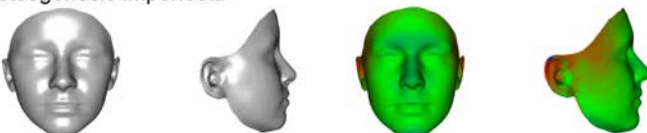

Pallister Killian

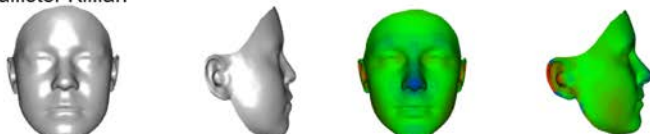

Phelan McDermid

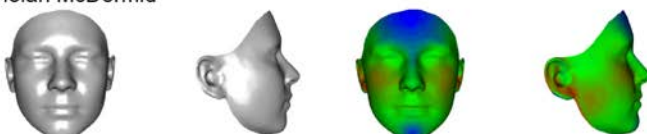

Pierre Robin Sequence

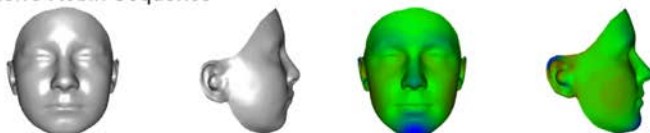

Pitt Hopkins

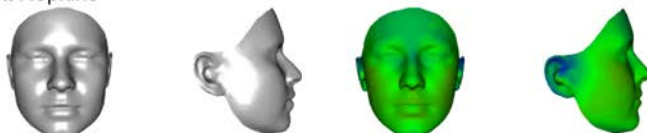

Prader-Willi

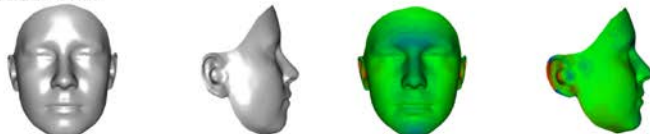

Pseudoachondroplasia

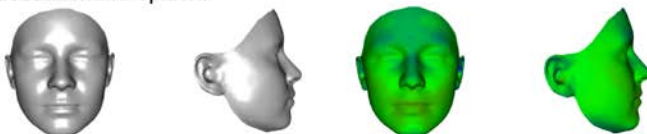

Rett

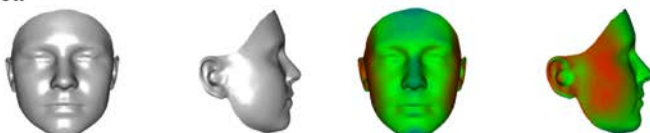

Rhizomelic Chondro Punctata

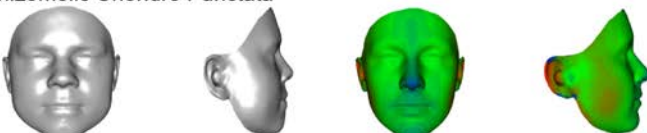

Rubinstein Taybi

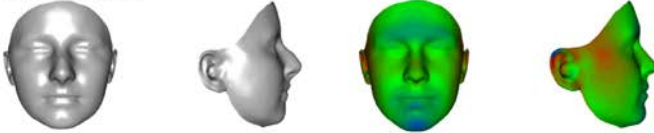

Russell Silver

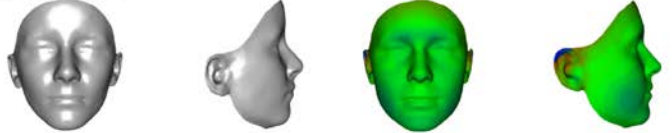

Smith Lemli Opitz

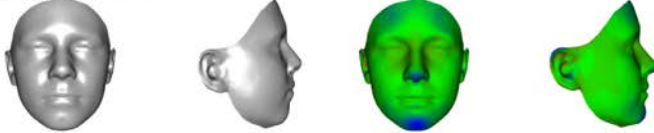

Smith Magenis

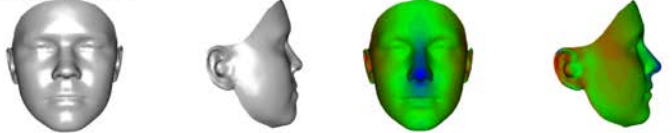

Sotos

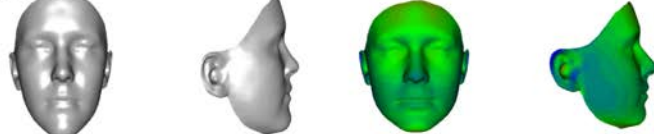

Spondyloepiphyseal

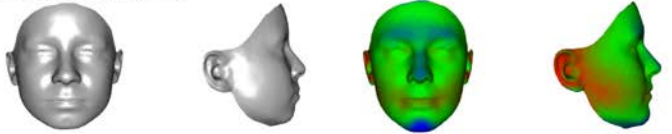

Stickler

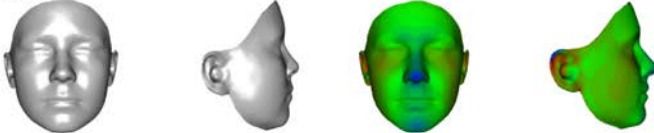

Treacher Collins

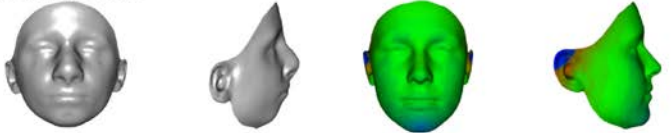

Trisomy 18

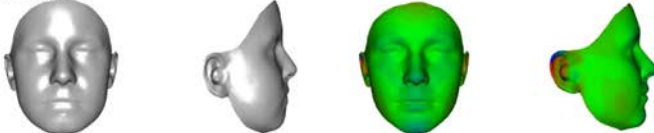

Turner

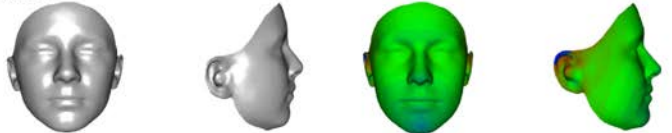

Unrelated Unaffected

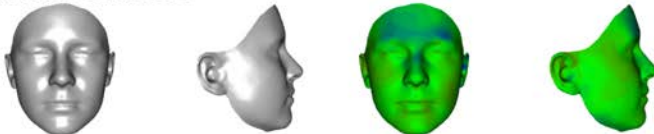

Van der Woude

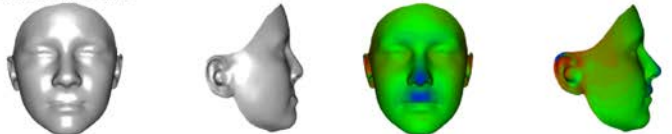

Williams

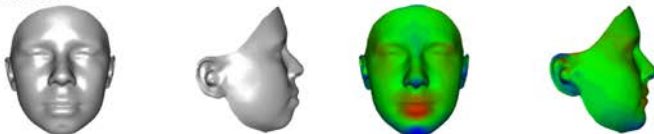

Wolff Hirschhorn

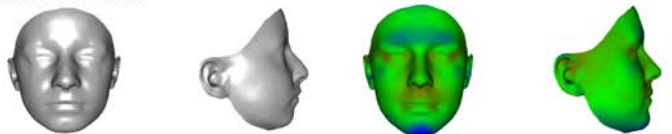

XHLED

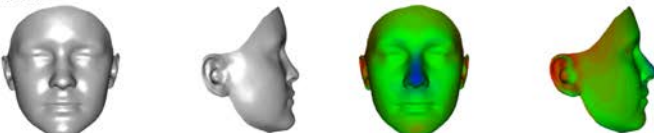

XXYY

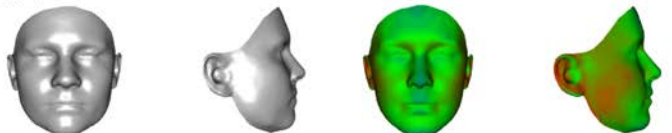

Zellweger

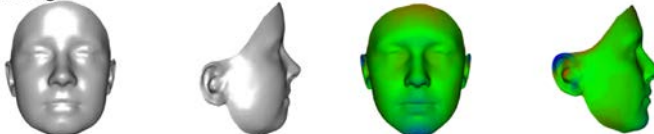

**Figure S7:** Syndrome Classification by Canonical Variates Analysis (CVA). (A) Classification accuracy by syndrome. For each syndrome, the graph shows the proportion of syndromes for which the correct diagnosis is the top choice, in the top three, and in the top 10. B) Rankings of Correct Classifications using HDRDA. A) Counts and proportions for how often the true diagnosis is among the 10 highest ranked diagnoses for the full classification sample that included both syndromic subjects and unrelated, unaffected subjects, and partitioning the true diagnosis ranks as syndromic and unrelated, unaffected subjects.

A) Classification sensitivities by syndrome

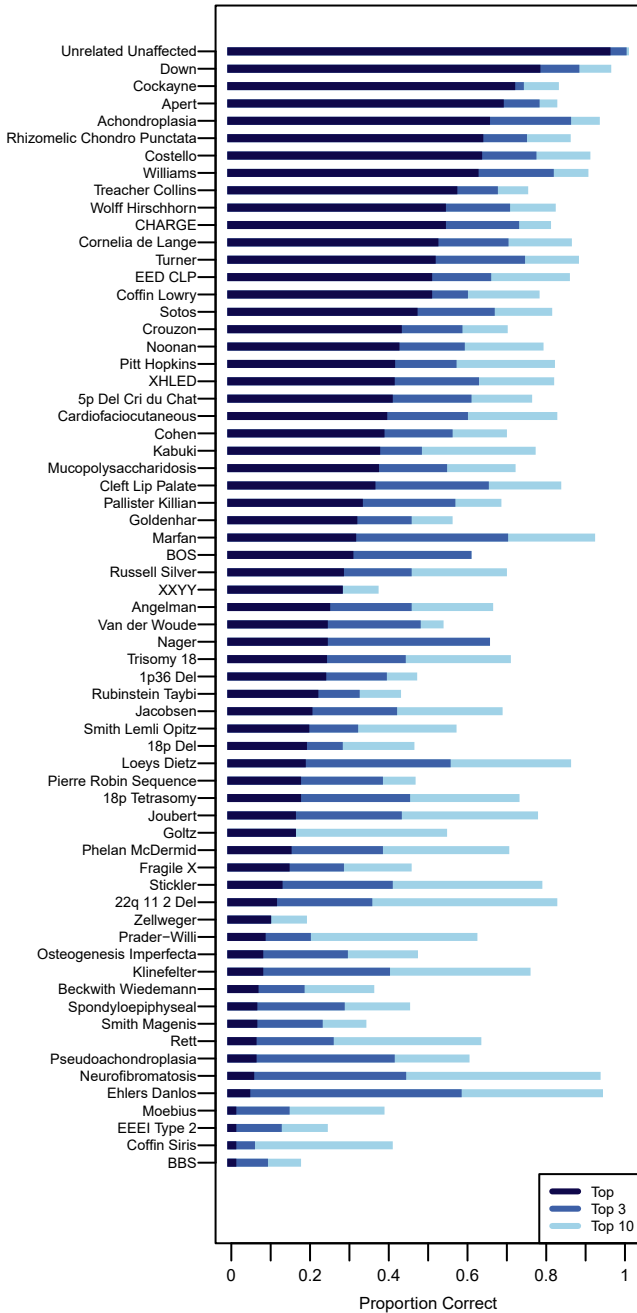

B) Ranks for true diagnoses

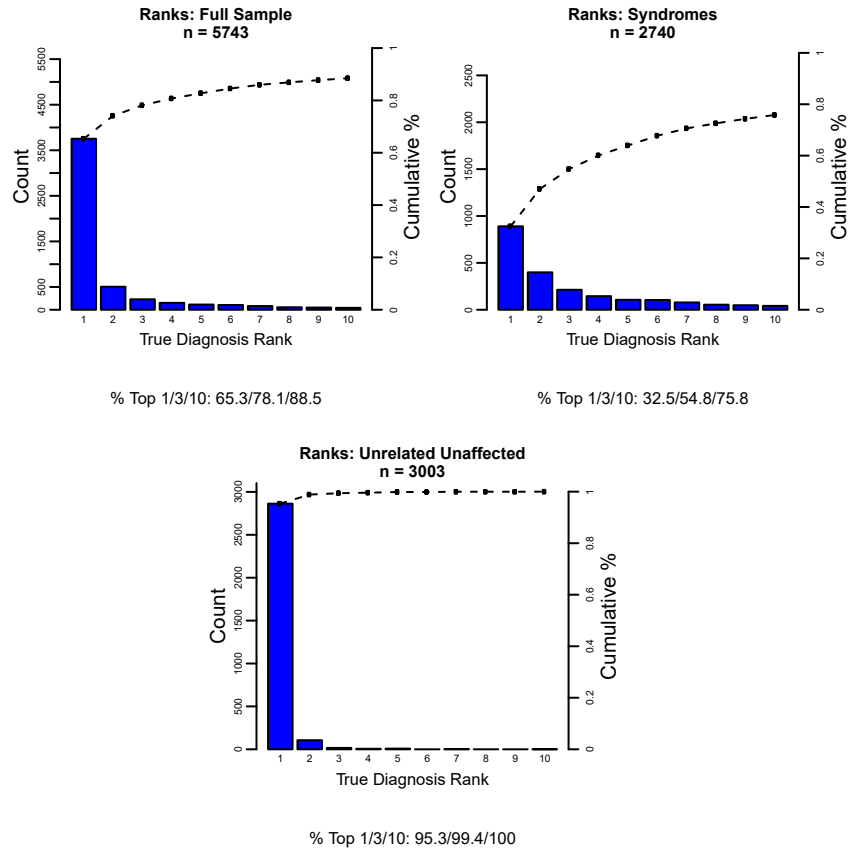

HDRDA Posterior Probability Matrix

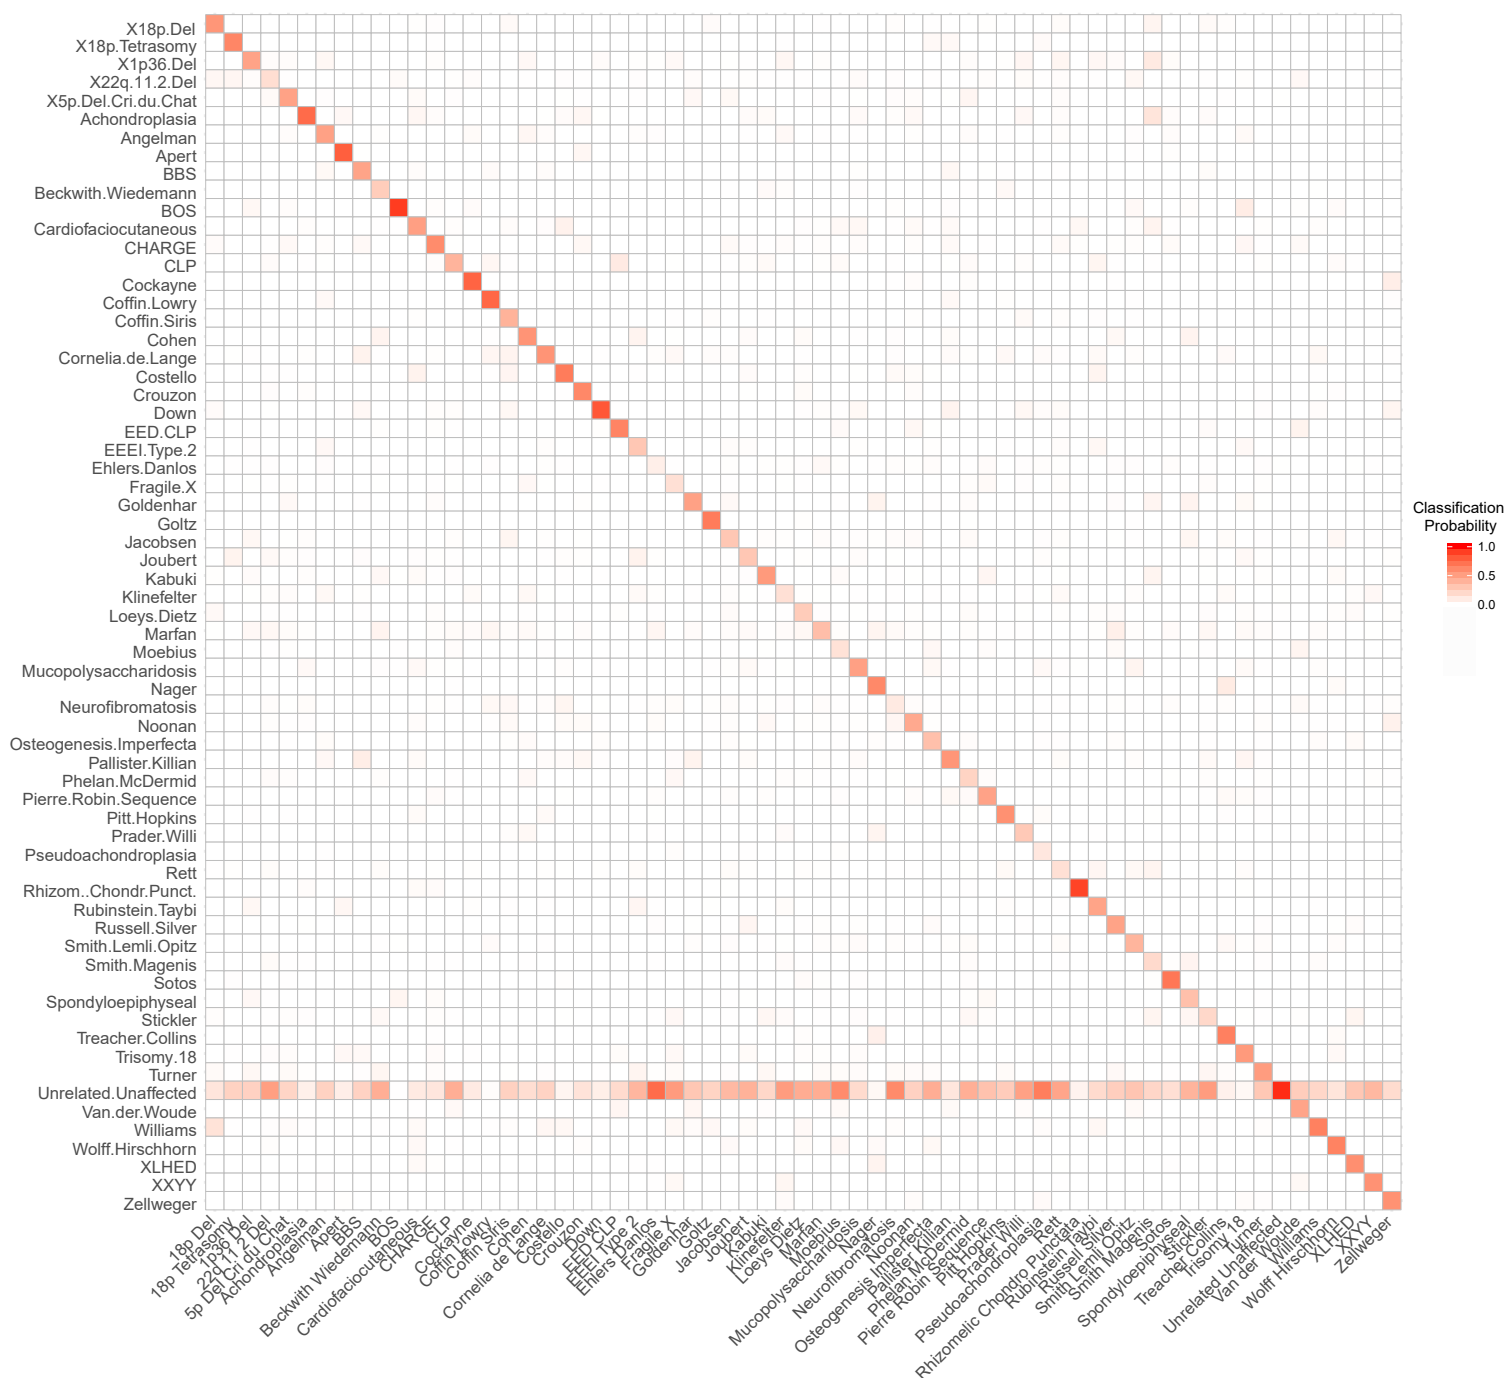

Figure S8

**Figure S9:** Relationship between the number of syndromes and top choice accuracy

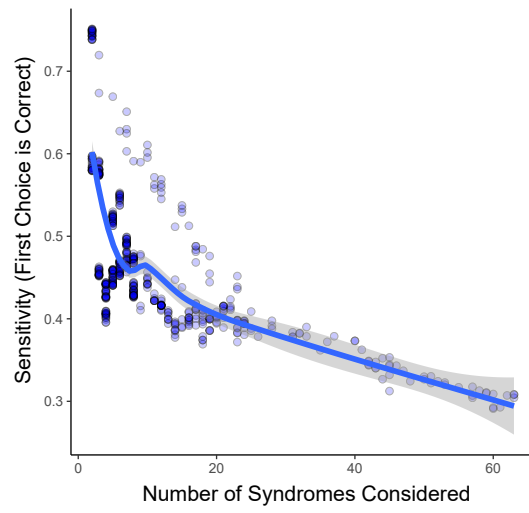

**Table S1:** Patient meetings attended

| <b>Conference</b>                                            | <b>Syndromes</b>                                                                                                                                                                           | <b>Years Attended</b>     |
|--------------------------------------------------------------|--------------------------------------------------------------------------------------------------------------------------------------------------------------------------------------------|---------------------------|
| 11q Research & Resource Group                                | Jacobsen Syndrome                                                                                                                                                                          | 2014, 2018                |
| PWS Kids                                                     | Prader-Willi Syndrome                                                                                                                                                                      | 2014                      |
| CdLS Foundation                                              | Cornelia de Lange Syndrome                                                                                                                                                                 | 2014, 2016,<br>2018       |
| Stickler Involved People                                     | Stickler Syndrome                                                                                                                                                                          | 2014, 2015,<br>2016, 2018 |
| 4p- Support Group                                            | Wolf-Hirschhorn Syndrome                                                                                                                                                                   | 2014,<br>2017,2018        |
| National Foundation for Ectodermal Dysplasias                | Hypohidrotic Ectodermal Dysplasia<br>X-Linked Hypohidrotic Ectodermal<br>Dysplasia<br>Ectro-dactyly Ectodermal Dysplasia - Cleft<br>Lip/Palate Syndrome<br>Goltz Syndrome                  | 2014, 2015                |
| Kabuki Syndrome Network                                      | Kabuki Syndrome                                                                                                                                                                            | 2014, 2015                |
| Cohen Syndrome Association                                   | Cohen Syndrome                                                                                                                                                                             | 2014, 2016                |
| Little People of America                                     | Achondroplasia<br>Pseudoachondroplasia                                                                                                                                                     | 2014, 2015,<br>2016       |
| National Downs Syndrome Congress                             | Trisomy 21                                                                                                                                                                                 | 2014, 2015                |
| Turner Syndrome conference                                   | Turner Syndrome                                                                                                                                                                            | 2014                      |
| Angelman Syndrome Foundation                                 | Angelman Syndrome                                                                                                                                                                          | 2015, 2017                |
| The Ehlers-Danlos Society                                    | Ehlers-Danlos Syndrome                                                                                                                                                                     | 2015                      |
| Share & Care Cockayne Syndrome Network                       | Cockayne Syndrome                                                                                                                                                                          | 2015, 2016,<br>2017       |
| Chromosome 18 Registry & Research Society                    | 18p-<br>Tetrasomy 18p                                                                                                                                                                      | 2015, 2018                |
| CFC International                                            | Cardio-Facio-Cutaneous Syndrome<br>Costello Syndrome                                                                                                                                       | 2015, 2017                |
| The CHARGE Syndrome Foundation                               | CHARGE Syndrome                                                                                                                                                                            | 2015, 2017                |
| Association for X and Y Chromosome Variations                | XXY Syndrome<br><br>XYY Syndrome<br>XXYY Syndrome<br>XXX Syndrome                                                                                                                          | 2015, 2017                |
| DUP15q Alliance                                              | Dup15q Syndrome                                                                                                                                                                            | 2015                      |
| Turner Syndrome Society of the United States                 | Turner Syndrome                                                                                                                                                                            | 2015                      |
| Children's Craniofacial Association                          | Apert Syndrome<br>Crane-Heise Syndrome<br>Crouzon Syndrome<br>Moebius Syndrome<br>Oropalatal Digital Syndrome<br>Pheiffer Syndrome<br>Sathre-Chotzen Syndrome<br>Treacher Collins Syndrome | 2015, 2017,<br>2018       |
| National Fragile X Foundation                                | Fragile X Syndrome                                                                                                                                                                         | 2016                      |
| Parents and Researchers Interested in Smith-Magenis Syndrome | Smith-Magenis Syndrome                                                                                                                                                                     | 2016                      |
| The Marfan Foundation                                        | Marfan Syndrome                                                                                                                                                                            | 2016                      |



| Ehlers-Danlos Syndrome                                        |                                                                                                                                 |                           |
|---------------------------------------------------------------|---------------------------------------------------------------------------------------------------------------------------------|---------------------------|
| Support Organization for Trisomy 18, 13 and Related Disorders | Trisomy 18 Syndrome<br>Mosaic Trisomy 18 Syndrome<br>4p- Deletion Syndrome<br>Trisomy 13 Mosaic Syndrome<br>Trisomy 13 Syndrome | 2016, 2017,<br>2018, 2019 |
| William Syndrome Association                                  | William Syndrome                                                                                                                | 2016                      |
| Noonan Syndrome Foundation                                    | Noonan Syndrome                                                                                                                 | 2016                      |
| Loeys-Dietz Syndrome Foundation                               | Loeys-Dietz Syndrome                                                                                                            | 2016, 2018                |
| 5p- Society                                                   | Cri du Chat Syndrome                                                                                                            | 2017, 2018                |
| Costello Syndrome Family Network                              | Costello Syndrome                                                                                                               | 2017                      |
| Joubert Syndrome and Related Disorders Foundation             | Joubert Syndrome                                                                                                                | 2017                      |
| Smith-Lemli-Opitz   RSH Foundation                            | Smith-Lemli-Opitz Syndrome                                                                                                      | 2017                      |
| Coffin-Lowry Syndrome Foundation                              | Coffin-Lowry Syndrome                                                                                                           | 2017, 2018                |
| Rubinstein – Taybi Syndrome Support Group                     | Rubenstein-Taybi Syndrome                                                                                                       | 2017                      |
| Coffin-Siris Syndrome Foundation                              | Coffin-Siris Syndrome                                                                                                           | 2017, 2018                |
| RhizoKids International                                       | Rhizomelic Chondrodysplasia Punctata                                                                                            | 2017, 2018                |
| Global Foundation for Peroxisomal Disorders                   | Peroxisomal Biogenesis Disorder                                                                                                 | 2017                      |
| Foundation for Prader-Willi Research                          | Prader-Willi Syndrome                                                                                                           | 2017                      |
| The MAGIC Foundation                                          | McCune Albright Syndrome<br>Russell Silver Syndrome                                                                             | 2017, 2018                |
| Foundation for Nager & Miller Syndromes                       | Nager Syndrome<br>Miller Syndrome                                                                                               | 2017                      |
| Pitt Hopkins Research Foundation                              | Pitt Hopkins Syndrome                                                                                                           | 2018                      |
| PKS Kids                                                      | Pallister-Killian Syndrome                                                                                                      | 2018                      |
| MPS Society                                                   | Mucopolysaccharidosis                                                                                                           | 2018                      |
| Sotos Syndrome Support Association                            | Sotos Syndrome                                                                                                                  | 2018                      |
| Phelan-McDermid Syndrome Foundation                           | Phelan-McDermid Syndrome                                                                                                        | 2018                      |
| The Bohring-Opitz Syndrome Foundation, Inc.                   | Bohring-Opitz Syndrome                                                                                                          | 2018                      |
| 1p36 Deletion Support & Awareness                             | 1p36 Deletion Syndrome                                                                                                          | 2018                      |
| Bardet Biedl Syndrome Foundation                              | Bardet Biedl Syndrome                                                                                                           | 2018                      |
| ASXL Conference                                               | Bohring-Opiz Syndrome                                                                                                           | 2019                      |
|                                                               | Bainbridge-Ropers Syndrome                                                                                                      |                           |
|                                                               | Sashi-Pena Syndrome                                                                                                             |                           |
| Bohring-Opitz Family Meeting                                  | Bohring-Opiz Syndrome                                                                                                           | 2019                      |
| DYRK1A Seattle Meet-up June                                   | DYRK1A-Related Syndrome                                                                                                         | 2019                      |
| Bardet Biedl Syndrome Foundation                              | Bardet Biedl Syndrome                                                                                                           | 2018                      |
| Neurofibromatosis California                                  | Neurofibromatosis Type 1                                                                                                        | 2018                      |
| Soft Bones-The US Hypophosphatasia Foundation                 | The US Hypophosphatasia Foundation                                                                                              | 2019                      |

| US Census 2010                   |            | FB2 syndromic subjects and relatives |                                   |                                   |
|----------------------------------|------------|--------------------------------------|-----------------------------------|-----------------------------------|
| Race (NIH Classification)        | Percentage | Count                                | Percentage including not reported | Percentage excluding not reported |
| White                            | 76.5%      | 2684                                 | 66.2%                             | 83.1%                             |
| Black/African American           | 13.4%      | 54                                   | 1.3%                              | 1.7%                              |
| American Indian/Alaska Native    | 1.3%       | 12                                   | 0.3%                              | 0.4%                              |
| Asian                            | 5.9%       | 102                                  | 2.5%                              | 3.2%                              |
| Native Hawaiian/Pacific Islander | 0.2%       | 1                                    | 0.0%                              | 0.0%                              |
| More than one race               | 2.7%       | 375                                  | 9.3%                              | 11.6%                             |
| Unknown or not reported          | NA         | 826                                  | 20.4%                             |                                   |
| Total                            |            | 4054                                 |                                   |                                   |
| Excluding not reported           |            | 3228                                 |                                   |                                   |
| Ethnicity (NIH Classification)   | Percentage | Count                                | Percentage including not reported | Percentage excluding not reported |
| Hispanic/Latino                  | 18.3       | 422                                  | 10.4%                             | 12.7%                             |
| Not Hispanic/Latino              | 81.7       | 2906                                 | 71.7%                             | 87.3%                             |
| unknown/not reported             | NA         | 726                                  | 17.9%                             |                                   |
| Total                            |            | 4054                                 |                                   |                                   |
| Excluding not reported           |            | 3328                                 |                                   |                                   |

**Table S3:** RRPP MANCOVA for facial shape on age, sex and self-reported race

1) *Syndromic subjects only*

|           | Df   | SS    | MS   | Rsq   | F      | Z     | <i>p</i> |
|-----------|------|-------|------|-------|--------|-------|----------|
| Age       | 1    | 1.35  | 1.35 | 0.093 | 368.05 | 10.65 | <0.001   |
| Age2      | 1    | 0.58  | 0.58 | 0.040 | 159.76 | 10.10 | <0.001   |
| Age3      | 1    | 0.16  | 0.16 | 0.011 | 43.02  | 8.06  | <0.001   |
| Sex       | 1    | 0.09  | 0.09 | 0.007 | 25.89  | 7.32  | <0.001   |
| Race      | 7    | 0.15  | 0.02 | 0.011 | 6.05   | 9.25  | <0.001   |
| Residuals | 3315 | 12.12 | 0.00 | 0.838 |        |       |          |
| Total     | 3326 | 14.46 |      |       |        |       |          |

2) *Unaffected, unrelated subjects only*

|         | Df   | SS   | MS   | Rsq   | F      | Z     | <i>p</i> |
|---------|------|------|------|-------|--------|-------|----------|
| Age     | 1    | 1.28 | 1.28 | 0.189 | 798.01 | 11.31 | <0.001   |
| Age2    | 1    | 0.35 | 0.35 | 0.051 | 215.50 | 10.82 | <0.001   |
| Age3    | 1    | 0.11 | 0.11 | 0.017 | 71.12  | 9.01  | <0.001   |
| Sex     | 1    | 0.13 | 0.13 | 0.019 | 82.25  | 9.59  | <0.001   |
| Race    | 6    | 0.11 | 0.02 | 0.016 | 11.22  | 11.80 | <0.001   |
| Residua | 2992 | 4.80 | 0.00 | 0.708 |        |       |          |
| Total   | 3002 | 6.78 |      |       |        |       |          |

\*Units are in Procrustes distance

**Table S4:** Facial shape variance due to syndrome

|                                                                | Df   | SS     | MS    | Rsq   | F     | Z     | <i>p</i> |
|----------------------------------------------------------------|------|--------|-------|-------|-------|-------|----------|
| <i>1) Symmetrized Data including unrelated unaffecteds</i>     |      |        |       |       |       |       |          |
| Syndrome                                                       | 64   | 2.059  | 0.032 | 0.148 | 15.45 | 24.30 | <0.001   |
| Residuals                                                      | 5678 | 11.822 | 0.002 | 0.852 |       |       |          |
| <i>2) Full Procrustes Data including unrelated unaffecteds</i> |      |        |       |       |       |       |          |
| Syndrome                                                       | 64   | 2.097  | 0.033 | 0.138 | 14.18 | 24.81 | <0.001   |
| Residuals                                                      | 5678 | 13.121 | 0.002 | 0.862 |       |       |          |
| <i>3) Symmetrized Data excluding unrelated unaffecteds</i>     |      |        |       |       |       |       |          |
| Syndrome                                                       | 63   | 1.669  | 0.026 | 0.186 | 9.73  | 22.12 | <0.001   |
| Residuals                                                      | 2675 | 7.276  | 0.003 | 0.812 |       |       |          |
| <i>4) Full Procrustes Data excluding unrelated unaffecteds</i> |      |        |       |       |       |       |          |
| Syndrome                                                       | 63   | 1.669  | 0.026 | 0.186 | 9.73  | 22.12 | <0.001   |
| Residuals                                                      | 2676 | 7.287  | 0.003 | 0.814 |       |       |          |

\*Units are in Procrustes distance

**Table S5:** Unweighted average sensitivities across syndromes

|                                                                                    | Top 1 | Top 3 | Top 10 |
|------------------------------------------------------------------------------------|-------|-------|--------|
| 1) <i>CVA</i>                                                                      |       |       |        |
| Full classification sample (syndromic subjects and unrelated, unaffected subjects) | 30.0% | 48.3% | 67.3%  |
| Syndrome-only classification sample                                                | 34.0% | 52.0% | 68.0%  |
| 2) <i>HDRDA</i>                                                                    |       |       |        |
| Full classification sample (syndromic subjects and unrelated, unaffected subjects) | 48.8% | 69.3% | 87.2%  |
| Syndrome-only classification sample                                                | 56.9% | 73.9% | 88.5%  |

| Syndrome             | N   | Parametric Classification          |     |                      |     | HDRDA Classification       |     |                    |     | Most Similar Syndrome<br>(Minimum Procrustes Distance) |
|----------------------|-----|------------------------------------|-----|----------------------|-----|----------------------------|-----|--------------------|-----|--------------------------------------------------------|
|                      |     | Most Frequent classification error | %   | Next miss            | %   | Most Frequent Misdiagnosis | %   | Next miss          | %   |                                                        |
| 18p Del              | 11  | Williams                           | 27% | 22q 11 2 Del         | 18% | Unrelated Unaffected       | 18% | Williams           | 18% | Stickler                                               |
| 18p Tetrasomy        | 18  | Unrelated Unaffected               | 56% | Joubert              | 11% | Unrelated Unaffected       | 28% | Joubert            | 6%  | Coffin Siris                                           |
| 1p36 Del             | 26  | Unrelated Unaffected               | 31% | Pitt Hopkins         | 8%  | Unrelated Unaffected       | 27% | BOS                | 4%  | Fragile X                                              |
| 22q 11 2 Del         | 66  | Unrelated Unaffected               | 58% | 5p Del Cri du Chat   | 3%  | Unrelated Unaffected       | 55% | Joubert            | 3%  | Klinefelter                                            |
| 5p Del Cri du Chat   | 65  | Unrelated Unaffected               | 26% | Angelman             | 5%  | Unrelated Unaffected       | 23% | CHARGE             | 3%  | Phelan McDermid                                        |
| Achondroplasia       | 68  | Unrelated Unaffected               | 9%  | Cardiofaciocutaneous | 4%  | Unrelated Unaffected       | 7%  | Mucopolysaccharidc | 3%  | Crouzon                                                |
| Angelman             | 29  | Unrelated Unaffected               | 31% | Prader-Willi         | 7%  | Unrelated Unaffected       | 24% | BBS                | 3%  | Rett                                                   |
| Apert                | 22  | Achondroplasia                     | 9%  | Rubinstein Taybi     | 9%  | Unrelated Unaffected       | 9%  | Achondroplasia     | 5%  | Crouzon                                                |
| BBS                  | 12  | Unrelated Unaffected               | 25% | CHARGE               | 17% | Unrelated Unaffected       | 25% | CHARGE             | 8%  | Stickler                                               |
| Beckwith Wiedemann   | 17  | Unrelated Unaffected               | 65% | Cohen                | 6%  | Unrelated Unaffected       | 47% | Cohen              | 6%  | Unrelated Unaffected                                   |
| BOS                  | 10  | Unrelated Unaffected               | 40% | Pallister Killian    | 10% | Spondyloepiphyseal         | 10% | Achondroplasia     | 0%  | 5p Del Cri du Chat                                     |
| Cardiofaciocutaneous | 44  | Unrelated Unaffected               | 14% | Costello             | 11% | Unrelated Unaffected       | 11% | Costello           | 7%  | Costello                                               |
| CHARGE               | 86  | Unrelated Unaffected               | 16% | Down                 | 2%  | Unrelated Unaffected       | 12% | Achondroplasia     | 2%  | Jacobsen                                               |
| Cleft Lip Palate     | 87  | Unrelated Unaffected               | 38% | Jacobsen             | 3%  | Unrelated Unaffected       | 45% | Van der Woude      | 3%  | Van der Woude                                          |
| Cockayne             | 45  | Unrelated Unaffected               | 11% | Klinefelter          | 4%  | Unrelated Unaffected       | 9%  | Angelman           | 2%  | 5p Del Cri du Chat                                     |
| Coffin Lowry         | 22  | Unrelated Unaffected               | 9%  | Williams             | 9%  | BBS                        | 5%  | Cleft Lip Palate   | 5%  | Williams                                               |
| Coffin Siris         | 20  | Unrelated Unaffected               | 40% | Williams             | 10% | Unrelated Unaffected       | 25% | Cornelia de Lange  | 5%  | Marfan                                                 |
| Cohen                | 29  | Unrelated Unaffected               | 17% | 1p36 Del             | 7%  | Unrelated Unaffected       | 17% | Angelman           | 3%  | Rett                                                   |
| Cornelia de Lange    | 62  | Unrelated Unaffected               | 23% | Williams             | 6%  | Unrelated Unaffected       | 23% | Pitt Hopkins       | 5%  | Jacobsen                                               |
| Costello             | 51  | Cardiofaciocutaneous               | 12% | Unrelated Unaffected | 6%  | Cardiofaciocutaneous       | 6%  | Neurofibromatosis  | 6%  | Cardiofaciocutaneous                                   |
| Crouzon              | 26  | Unrelated Unaffected               | 19% | Apert                | 12% | Unrelated Unaffected       | 19% | Achondroplasia     | 4%  | 18p Del                                                |
| Down                 | 111 | Unrelated Unaffected               | 8%  | 1p36 Del             | 2%  | Unrelated Unaffected       | 12% | 1p36 Del           | 2%  | Smith Magenis                                          |
| EED CLP              | 20  | Unrelated Unaffected               | 25% | Cleft Lip Palate     | 15% | Unrelated Unaffected       | 20% | Cleft Lip Palate   | 15% | Cleft Lip Palate                                       |
| EEEI Type 2          | 17  | Unrelated Unaffected               | 65% | Rett                 | 12% | Unrelated Unaffected       | 47% | Cohen              | 6%  | Rett                                                   |
| Ehlers Danlos        | 106 | Unrelated Unaffected               | 80% | Marfan               | 5%  | Unrelated Unaffected       | 78% | Marfan             | 5%  | Neurofibromatosis                                      |
| Fragile X            | 29  | Unrelated Unaffected               | 62% | 1p36 Del             | 3%  | Unrelated Unaffected       | 59% | Cornelia de Lange  | 3%  | Prader-Willi                                           |
| Goldenhar            | 29  | Unrelated Unaffected               | 34% | 1p36 Del             | 3%  | Unrelated Unaffected       | 31% | Pallister Killian  | 7%  | Turner                                                 |
| Goltz                | 13  | Unrelated Unaffected               | 38% | Noonan               | 15% | Unrelated Unaffected       | 23% | Williams           | 8%  | Unrelated Unaffected                                   |

|                          |      |                      |                           |      |                      |                           |     |                       |
|--------------------------|------|----------------------|---------------------------|------|----------------------|---------------------------|-----|-----------------------|
| Jacobsen                 | 56   | Unrelated Unaffected | 41% 5p Del Cri du Chat    | 5%   | Unrelated Unaffected | 43% X5p Del Cri du Chat   | 5%  | Cornelia de Lange     |
| Joubert                  | 52   | Unrelated Unaffected | 46% Fragile X             | 4%   | Unrelated Unaffected | 42% Russell Silver        | 6%  | Neurofibromatosis     |
| Kabuki                   | 38   | Unrelated Unaffected | 29% CHARGE                | 5%   | Unrelated Unaffected | 24% Stickler              | 5%  | Stickler              |
| Klinefelter              | 56   | Unrelated Unaffected | 50% Angelman              | 7%   | Unrelated Unaffected | 59% 1p36 Del              | 5%  | 22q 11 2 Del          |
| Loeys Dietz              | 95   | Unrelated Unaffected | 45% Marfan                | 3%   | Unrelated Unaffected | 44% Marfan                | 3%  | Ehlers Danlos         |
| Marfan                   | 163  | Unrelated Unaffected | 47% Noonan                | 2%   | Unrelated Unaffected | 45% Ehlers Danlos         | 3%  | Loeys Dietz           |
| Moebius                  | 29   | Unrelated Unaffected | 79% Cardiofaciocutaneous  | 3%   | Unrelated Unaffected | 62% Cardiofaciocutaneous  | 3%  | 22q 11 2 Del          |
| Mucopolysaccharidosis    | 52   | Unrelated Unaffected | 29% Achondroplasia        | 6%   | Unrelated Unaffected | 21% Down                  | 4%  | Jacobsen              |
| Nager                    | 17   | Treacher Collins     | 41% Goldenhar             | 6%   | Goldenhar            | 6% Marfan                 | 6%  | Treacher Collins      |
| Neurofibromatosis        | 83   | Unrelated Unaffected | 66% Ehlers Danlos         | 4%   | Unrelated Unaffected | 69% Costello              | 4%  | Ehlers Danlos         |
| Noonan                   | 60   | Unrelated Unaffected | 27% Cardiofaciocutaneous  | 5%   | Unrelated Unaffected | 25% EED CLP               | 5%  | Cardiofaciocutaneous  |
| Osteogenesis Imperfecta  | 28   | Unrelated Unaffected | 54% 18p Tetrasomy         | 4%   | Unrelated Unaffected | 43% Ehlers Danlos         | 4%  | Moebius               |
| Pallister Killian        | 34   | Unrelated Unaffected | 12% Cornelia de Lange     | 9%   | Unrelated Unaffected | 15% Down                  | 6%  | Fragile X             |
| Phelan McDermid          | 56   | Unrelated Unaffected | 48% 5p Del Cri du Chat    | 5%   | Unrelated Unaffected | 39% 5p Del Cri du Chat    | 5%  | 22q 11 2 Del          |
| Pierre Robin Sequence    | 24   | Unrelated Unaffected | 50% CHARGE                | 8%   | Unrelated Unaffected | 33% Kabuki                | 8%  | Moebius               |
| Pitt Hopkins             | 32   | Unrelated Unaffected | 25% 22q 11 2 Del          | 3%   | Unrelated Unaffected | 28% Rett                  | 6%  | Pseudoachondroplasia  |
| Prader-Willi             | 26   | Unrelated Unaffected | 58% 1p36 Del              | 4%   | Unrelated Unaffected | 54% Achondroplasia        | 4%  | Fragile X             |
| Pseudoachondroplasia     | 37   | Unrelated Unaffected | 68% Mucopolysaccharidosis | 5%   | Unrelated Unaffected | 70% Cornelia de Lange     | 3%  | Pitt Hopkins          |
| Rett                     | 56   | Unrelated Unaffected | 46% Klinefelter           | 7%   | Unrelated Unaffected | 52% 1p36 Del              | 5%  | XXYY                  |
| Rhizomelic Chondro Punct | 27   | Unrelated Unaffected | 11% Cardiofaciocutaneous  | 4%   | Unrelated Unaffected | 7% Cardiofaciocutaneous   | 4%  | Smith Magenis         |
| Rubinstein Taybi         | 19   | Unrelated Unaffected | 42% Cleft Lip Palate      | 5%   | Unrelated Unaffected | 16% Cleft Lip Palate      | 5%  | Moebius               |
| Russell Silver           | 29   | Unrelated Unaffected | 31% Marfan                | 7%   | Unrelated Unaffected | 31% Marfan                | 7%  | Turner                |
| Smith Lemli Opitz        | 32   | Unrelated Unaffected | 41% Mucopolysaccharidosis | 6%   | Unrelated Unaffected | 38% Mucopolysaccharidosis | 6%  | Ehlers Danlos         |
| Smith Magenis            | 18   | Unrelated Unaffected | 22% Achondroplasia        | 17%  | Unrelated Unaffected | 22% Achondroplasia        | 11% | Down                  |
| Sotos                    | 41   | Unrelated Unaffected | 22% Marfan                | 7%   | Unrelated Unaffected | 17% Achondroplasia        | 2%  | 18p Tetrasomy         |
| Spondyloepiphyseal       | 18   | Unrelated Unaffected | 61% Stickler              | 11%  | Unrelated Unaffected | 39% Cohen                 | 6%  | Rett                  |
| Stickler                 | 50   | Unrelated Unaffected | 60% Marfan                | 4%   | Unrelated Unaffected | 56% Turner                | 4%  | Moebius               |
| Treacher Collins         | 39   | Nager                | 13% Unrelated Unaffected  | 13%  | Nager                | 10% Unrelated Unaffected  | 8%  | Nager                 |
| Trisomy 18               | 30   | Unrelated Unaffected | 13% BOS                   | 7%   | BOS                  | 10% Angelman              | 3%  | Coffin Siris          |
| Turner                   | 110  | Unrelated Unaffected | 30% Down                  | 2%   | Unrelated Unaffected | 29% Smith Lemli Opitz     | 2%  | Pierre Robin Sequence |
| Unrelated Unaffected     | 3003 | Loeys Dietz          | 0.4% Turner               | 0.4% |                      |                           |     | Ehlers Danlos         |

|                  |    |                      |                      |     |                      |                       |    |                   |
|------------------|----|----------------------|----------------------|-----|----------------------|-----------------------|----|-------------------|
| Van der Woude    | 17 | Unrelated Unaffected | 29% Cleft Lip Palate | 24% | Unrelated Unaffected | 29% EED CLP           | 6% | Cleft Lip Palate  |
| Williams         | 68 | Unrelated Unaffected | 22% Marfan           | 4%  | Unrelated Unaffected | 22% Cornelia de Lange | 4% | Neurofibromatosis |
| Wolff Hirschhorn | 43 | Unrelated Unaffected | 12% Trisomy 18       | 7%  | Unrelated Unaffected | 12% Jacobsen          | 5% | Cornelia de Lange |
| XHLED            | 42 | Unrelated Unaffected | 36% Down             | 5%  | Unrelated Unaffected | 29% Stickler          | 5% | Rett              |
| XXYY             | 11 | Unrelated Unaffected | 64% Klinefelter      | 9%  | Unrelated Unaffected | 36% Klinefelter       | 9% | Klinefelter       |
| Zellweger        | 11 | Unrelated Unaffected | 27% Cleft Lip Palate | 9%  | Unrelated Unaffected | 18% Cockayne          | 9% | Kabuki            |
