# Supplementary material for: Automated syndrome diagnosis by three-dimensional facial imaging
Source: PubMed Central journal article supplement (PMC7521994; doi:10.1038/s41436-020-0845-y), 2020-06-01
Supplement: 41436_2020_845_MOESM2_ESM.pdf [file 41436_2020_845_MOESM2_ESM.pdf]

| Sample Size | Syndrome                                   |
|-------------|--------------------------------------------|
| 916         | Relative                                   |
| 190         | Cleft Lip/Palate                           |
| 189         | Marfan Syndrome                            |
| 162         | Down Syndrome                              |
| 157         | Unaffected Unrelated                       |
| 123         | Turner Syndrome                            |
| 117         | Ehlers Danlos Syndrome                     |
| 105         | CHARGE Syndrome                            |
| 101         | Loeys-Dietz Syndrome                       |
| 97          | Cornelia de Lange Syndrome                 |
| 96          | Neurofibromatosis                          |
| 93          | 22q 11.2 Deletion Syndrome                 |
| 86          | Jacobsen Syndrome                          |
| 83          | Achondroplasia                             |
| 78          | 5p Deletion Cri du Chat                    |
| 76          | Williams-Beuren Syndrome                   |
| 74          | Klinefelter Syndrome                       |
| 72          | Phelan McDermid Syndrome                   |
| 69          | Noonan Syndrome                            |
| 69          | Wolf-Hirschhorn syndrome                   |
| 63          | Treacher Collins Syndrome                  |
| 59          | Mucopolysaccharidosis                      |
| 59          | Stickler Syndrome                          |
| 56          | Joubert Syndrome                           |
| 52          | Costello Syndrome                          |
| 52          | Rett Syndrome                              |
| 51          | Pallister-Killian Syndrome                 |
| 51          | Sotos Syndrome                             |
| 48          | Cockayne Syndrome                          |
| 47          | Cardiofaciocutaneous Syndrome              |
| 47          | Kabuki Syndrome                            |
| 46          | X-Linked Hypohidrotic Ectodermal Dysplasia |
| 42          | Goldenhar Syndrome                         |
| 39          | Pierre Robin Sequence                      |
| 38          | Pseudoachondroplasia                       |
| 38          | Smith-Lemli-Opitz Syndrome                 |
| 37          | Osteogenesis Imperfecta                    |
| 36          | Apert Syndrome                             |
| 36          | Crouzon Syndrome                           |
| 36          | Trisomy 18                                 |
| 35          | Angelman Syndrome                          |
| 35          | Prader-Willi Syndrome                      |
| 35          | Rhizomelic Chondrodysplasia Punctata       |
| 34          | 1p36 Deletion                              |
| 34          | Moebius Syndrome                           |
| 34          | Wiedemann-Steiner Syndrome                 |

|    |                                                    |
|----|----------------------------------------------------|
| 33 | Cohen Syndrome                                     |
| 33 | Fragile X                                          |
| 33 | Hypophosphatasia                                   |
| 33 | Pitt-Hopkins Syndrome                              |
| 33 | Russell Silver Syndrome                            |
| 26 | Rubinstein-Taybi Syndrome                          |
| 24 | Coffin-Siris Syndrome                              |
| 24 | Ectrodactyly-Ectodermal Dysplasia-Cleft Lip/Palate |
| 23 | Coffin-Lowry Syndrome                              |
| 22 | Nager Syndrome                                     |
| 21 | Epileptic Encephalopathy Early Infantile Type 2    |
| 21 | Spondyloepiphyseal Dysplasia                       |
| 20 | 18p Tetrasomy                                      |
| 20 | Beckwith-Weidemann Syndrome                        |
| 20 | Bohring-Opitz Syndrome                             |
| 20 | DYRK1A-Related Intellectual Disability Syndrome    |
| 20 | Ectodermal Dysplasia                               |
| 19 | Hemifacial Microsomia                              |
| 19 | Smith-Magenis Syndrome                             |
| 19 | Van der Woude Syndrome                             |
| 17 | Saethre-Chotzen Syndrome                           |
| 17 | XXYY                                               |
| 15 | Bardet-Biedl Syndrome                              |
| 14 | Bainbridge-Ropers Syndrome                         |
| 14 | Goltz Syndrome                                     |
| 14 | Pfeiffer Syndrome                                  |
| 14 | Zellweger Syndrome                                 |
| 13 | 18p Deletion                                       |
| 13 | Rett Syndrome_Other                                |
| 13 | Septo-Optic Dysplasia                              |
| 12 | Branchio-Oto-Renal Syndrome                        |
| 11 | Craniofrontonasal Dysplasia                        |
| 11 | XXX                                                |
| 10 | 15q Duplication                                    |
| 10 | Hypochondroplasia                                  |
| 10 | Trisomy 13                                         |
| 10 | VACTERL                                            |
| 9  | 22q11 Duplication                                  |
| 9  | Growth Hormone Deficiency                          |
| 9  | Skeletal Dysplasia                                 |
| 8  | Diastrophic Dysplasia                              |
| 8  | Gaucher Disease                                    |
| 8  | Simpson-Golabi-Behmel Syndrome                     |
| 8  | XYY                                                |
| 7  | 15q11.2 Deletion                                   |
| 7  | Muenke Syndrome                                    |
| 7  | Robinow Syndrome                                   |

|   |                                                |
|---|------------------------------------------------|
| 6 | Cleidocranial Dysostosis                       |
| 6 | McCune Albright Syndrome                       |
| 6 | Miller Syndrome                                |
| 6 | Opitz GBBB Syndrome                            |
| 5 | 15q26.3 Deletion                               |
| 5 | 16p11.2 Duplication                            |
| 5 | Frontonasal Dysplasia                          |
| 5 | Parry-Romberg Syndrome                         |
| 5 | PHACE Syndrome                                 |
| 5 | Phenylketonuria                                |
| 5 | Primordial Dwarfism                            |
| 5 | Tuberous Sclerosis                             |
| 5 | Xq28 Duplication                               |
| 4 | 16p11.2 Deletion                               |
| 4 | 1q21.1 Deletion                                |
| 4 | 1q21.1 Duplication                             |
| 4 | CLOVES Syndrome                                |
| 4 | Hydrotic Ectodermal Dysplasia                  |
| 4 | KBG syndrome                                   |
| 4 | Microcephaly                                   |
| 4 | Mowat-Wilson Syndrome                          |
| 4 | Potocki-Lupski Syndrome                        |
| 4 | Rett Syndrome_CDKL5                            |
| 4 | Trisomy 22                                     |
| 4 | Waardenburg Syndrome                           |
| 3 | 10q21.3 Deletion                               |
| 3 | 15q 13.3 Duplication                           |
| 3 | 15q Deletion                                   |
| 3 | 15q11.2 Duplication                            |
| 3 | 15q13.3 Deletion                               |
| 3 | 18q Deletion                                   |
| 3 | 21q22 Deletion                                 |
| 3 | 2q37 Deletion                                  |
| 3 | 3p.26.3 Deletion                               |
| 3 | 3q.29 Deletion                                 |
| 3 | Blepharocheilodontic Syndrome                  |
| 3 | Campomelic Dysplasia                           |
| 3 | Dilated Cardiomyopathy and Ataxia Syndrome     |
| 3 | Ellis-van Creveld Syndrome                     |
| 3 | Epileptic Encephalopathy                       |
| 3 | Guanidinoacetate Methyltransferase Deficiency  |
| 3 | Hurler Syndrome                                |
| 3 | Hypohidrotic Ectodermal Dysplasia              |
| 3 | Macrocephaly                                   |
| 3 | medium chain acyl-CoA dehydrogenase deficiency |
| 3 | Nail-Patella Syndrome                          |
| 3 | Oculocutaneous Albinism                        |

3 Otopalatodigital Syndrome  
3 Popliteal Pterygium Syndrome  
3 Roberts Syndrome  
3 Spondyloepimetaphyseal Dysplasia  
3 Velopharyngeal Insufficiency  
3 Xp22.3 Deletion  
2 12p11.22q11 Duplication  
2 13q21.32 Deletion  
2 16q13 Deletion  
2 19p13 Deletion  
2 19q13 Duplication  
2 1q44 Deletion  
2 2 Partial Deletion  
2 3q25 Duplication  
2 3q26 Deletion  
2 4q13 Duplication  
2 4q31 Deletion  
2 7q21.3 Deletion  
2 8p Inversion, Duplication, Deletion  
2 9p23 Deletion  
2 9p24.3 Deletion  
2 Alagille syndrome  
2 Alport Syndrome  
2 Andersen cardiomyopathic period paralysis  
2 Beals Syndrome  
2 Borjeson-Forssman-Lehmann Syndrome  
2 Branchiooculofacial syndrome  
2 Cerebrocostomandibular Syndrome  
2 Chromosomal Abnormality  
2 Chondrodysplasia Punctata  
2 Crane-Heise Syndrome  
2 Ea1 Dystonia  
2 Fabry Disease  
2 Femoral-Facial Syndrome  
2 GLASS Syndrome  
2 hereditary diffuse gastric cancer  
2 intellectual disability  
2 Intellectual Developmental Disability Disorder with Dysmorphic Facies and Ptosis  
2 Isodicentric 15  
2 Kleefstra Syndrome  
2 Klippel-Feil Syndrome  
2 Kniest dysplasia  
2 LADD Syndrome  
2 Lissencephaly  
2 Mandibulofacial Dysostosis Microcephaly Syndrome  
2 Marshall-Smith Syndrome  
2 MED12 Syndrome

2 MN1 Mutation  
2 NSDHL-related disorder  
2 Oculocerebrocutaneous Syndrome  
2 Odontoonychodermal Dysplasia  
2 Ornithine transcarbamylase deficiency  
2 Osteopetrosis  
2 Rett Syndrome\_FOXG1  
2 Spondylocostal Dysplasia  
2 Spondylometaphyseal Dysplasia  
2 Teebi Hypertelorism Syndrome  
2 Townes-Brocks Syndrome  
2 Trichorhinophalangeal Syndrome  
2 Trichothiodystrophy  
2 Trisomy 16  
2 Trisomy 8  
2 Trisomy 9  
2 Xp22.31 Duplication  
1 10p11.2q21.3 Inversion  
1 10q22.3 Deletion  
1 10q24.32-q25.1 Deletion  
1 10q25.1 Deletion  
1 10q25.2-q26.11 Deletion  
1 10q25.3 Duplication  
1 10q26 Deletion  
1 11;16 Translocation  
1 11q13.4-13.5 deletion  
1 11q14.1 Duplication  
1 11q24.1 or 2 Deletion  
1 12p Deletion  
1 12q21.23 Deletion; 11p14.2p14.1 Duplication  
1 12q24.31 Duplication; 16p13.11-16p12.3 Deletion  
1 12q24.32 anomaly  
1 13q Deletion  
1 13q12.3 - 13.3 Deletion  
1 14q11.2 Deletion  
1 14q11.2 Deletion/16p11.2 Duplication/17q21.4 Duplication  
1 15p Deletion  
1 15q Tetrasomy 11.2-13.3  
1 15q15.3 Deletion  
1 15q15.4 Deletion  
1 16p13.11 Deletion  
1 16p13.11 Duplication; 17q12 Deletion  
1 16p13.2 Duplication  
1 16q22 Deletion  
1 17p11 dup  
1 17p13.3 Deletion  
1 17q;21q Translocation

1 17q12 Duplication  
1 17q21.31 Deletion  
1 17q24.3q25.3 Duplication  
1 18q Duplication  
1 18q12.3 Deletion  
1 18q21.1q21.32 Duplication  
1 19q11-q13.11 Deletion  
1 1p31.3 Duplication  
1 1q24.2-1q25.3 deletion  
1 1q41 Duplication  
1 2 Duplication; 15 Duplication  
1 2p16.3 Deletion  
1 2q Deletion  
1 2q duplication, hEDS  
1 3p23q132 Inversion  
1 3p25.3-3p26.3 Deletion  
1 3q11 Deletion  
1 3q26 Duplication  
1 46,X,del(X)(q21.1)  
1 46Xadd(Y)(q11.2)  
1 4p Deletion Wolff-Hirschhorn Syndrome and 8p23.3 duplication  
1 4p.16 Translocation  
1 4q Deletion  
1 4q26-q28.2 Deletion; 12p Deletion  
1 4q34.3q35.2 Deletion  
1 5p Deletion Cri du Chat; Trisomy 20p  
1 5p14.1p14.3 Deletion  
1 5q13.2 Deletion  
1 5q14.3 Deletion  
1 5q35 microduplication  
1 6p Duplication; 6p Deletion  
1 6p25.3 Deletion  
1 6q Deletion  
1 6q15-6q16.1 Deletion; 6q21 deletion  
1 6q25.2-q26 Deletion  
1 6q25.3 Deletion  
1 6q25.3 Duplication  
1 7p14 Deletion  
1 7p22.1 Duplication  
1 7p22.1p21.3 Deletion  
1 7q Duplication  
1 7q(del 7q34q35 and dup 7q35q36.1)  
1 7q11.22 Deletion  
1 7q11.23 duplication/2p21 deletion  
1 7q11.2-q22.1 Duplication  
1 7q31.1 Duplication  
1 7q31.3q32.3 Deletion

1 7q32.1q32.2 Dup  
1 8p Tetrasomy  
1 8p11.21 Duplication  
1 8p22p12 Deletion  
1 8p22p21 Duplication  
1 8p23.1 Duplication  
1 8p23.2 Deletion; 8q24.22-q24.3 Duplication  
1 8p23.2-8p23.1 triplication  
1 8q22.1 Deletion  
1 8q24.12 deletion  
1 9p13.2 Duplication  
1 9q21.12 9q21.13 Deletion  
1 9q31.1-9q31.4 Deletion  
1 ACAN  
1 Acetabular Dysplasia  
1 Achondroplasia; Down Syndrome  
1 Achondroplasia; Geleophysic Dysplasia  
1 Acro-dermato-ungual-lacrima-tooth Syndrome  
1 Acromesomelic Dysplasia  
1 AKT3 Megalencephaly polymicrogyria-polydactyly-hydrocephalus syndrome  
1 Albright's hereditary osteodystrophy  
1 Alpha-1-Antitrypsin Deficiency  
1 Alstrom Syndrome  
1 Arthrogyposis, Distal  
1 Aural Atresia Unilateral  
1 Auriculocondylar Syndrome  
1 Axenfeld-Rieger  
1 Baraitser-Winter syndrome  
1 Bardet-Biedl; Moebius Syndrome  
1 Beare-Stevenson Syndrome  
1 Beta-Ketothiolase Deficiency  
1 Beta-Propeller Protein-Associated Neurodegeneration  
1 Biotinidase Deficiency  
1 Bloom Syndrome  
1 BPES Syndrome  
1 Brachydactyly  
1 Camurati-Engelmann disease  
1 Cantu Syndrome  
1 Carnitine Deficiency; systemic primary  
1 Cartilage Hair Hypoplasia  
1 Catel-Manzke Syndrome  
1 CDK13 Mutation  
1 Cherubism Syndrome  
1 Chromosome 6 interstitial deletion  
1 Cleidocranial Dysplasia  
1 Coffin Siris syndrome  
1 Coffin-Siris Syndrome with Dandy Walker variant

1 COFS Syndrome  
1 Congenital Adrenal Hyperplasia  
1 Congenital Disorder of Glycosylation  
1 Cranioectodermal Dysplasia  
1 Craniometaphyseal Dysplasia  
1 Cystic Fibrosis  
1 D-bifunctional Protein Deficiency  
1 Down Syndrome, Klinefelter  
1 Duane retraction Syndrome  
1 Dyskeratosis Congenita  
1 Dystonia  
1 Ear-patella-short stature Syndrome  
1 Ectrodactyly  
1 Emanuel Syndrome  
1 Facioscapulohumeral Muscular Dystrophy  
1 FBXO11 mutn  
1 FG syndrome  
1 Fibromuscular Dysplasia  
1 Fibrous Dysplasia  
1 Filippi Syndrome  
1 Fucosidosis  
1 Galactosemia  
1 Gitelman Syndrome  
1 Glutaric Acidemia  
1 Gorlin Syndrome  
1 Graves Disease  
1 Greig cephalopolysyndactyly syndrome  
1 Greig Syndrome  
1 Gyrate Atrophy of Choroid and Retina  
1 Hadju-Cheney syndrome  
1 Helsmoorte-Van der Aa syndrome  
1 Holoprosencephaly  
1 Hypertelorism Microtia Facial Clefting Syndrome  
1 Hypodontia  
1 Hypokalemic periodic paralysis  
1 Hypothalamic Pituitary Disorder  
1 Hypotonia  
1 IGF1R Resistance  
1 Infantile Refsum Disease  
1 isolated tracheoesophageal fistula  
1 Kallmann Syndrome  
1 Kartagener Syndrome  
1 KAT6A Syndrome  
1 Kearns-Sayre Syndrome  
1 Kleeblattschädel Deletion Syndrome  
1 Klinefelter Syndrome; Angelman Syndrome  
1 Larsen Syndrome



1 Leri-Weill Dyschondrosteosis  
1 Li-Fraumeni Syndrome  
1 Limb-girdle muscular dystrophy  
1 Malan syndrome  
1 Marfan Syndrome, Neurofibromatosis type 1  
1 Marshall Syndrome  
1 Meckel and Joubert Syndrome  
1 MECP2 triplication syndrome  
1 MED13L  
1 MED25  
1 Megalencephaly-Capillary Malformation  
1 Melnick-Needles Syndrome  
1 Mental Retardation Autosomal Dominant 23  
1 Mental Retardation, Autosomal Dominant 22  
1 Metaphyseal acroscyphoDysplasia  
1 Metaphyseal chondrodysplasia  
1 Metatropic Dysplasia  
1 Microphthalmia  
1 Miller-Dieker Syndrome  
1 Multiple Congenital Anomalies-Hypotonia-Seizures syndrome  
1 Multiple Endocrine Neoplasia  
1 Multiple Epiphysial Dysplasia  
1 mutation in KDM5C gene  
1 Myotonic Dystrophy  
1 Neurocardiogenic Synchopy  
1 Oligodontia  
1 Orofacial digital Syndrome NOS  
1 Orofaciodigital Syndrome  
1 PBX1 Variant  
1 PDCH19  
1 Potocki Shaffer Syndrome  
1 Propionic Acidemia  
1 Pseudohypoparathyroidism  
1 Pseudoxanthoma Elasticum  
1 Recombinant 8 Syndrome  
1 Rodriguez  
1 Schimke immuno-osseous Dysplasia  
1 Scleroderma  
1 Seckel Syndrome  
1 SEDc vs Kniest - two Orpha #s  
1 Setleis Syndrome  
1 Shashi-Pena Syndrome  
1 Short chain acyl-CoA dehydrogenase deficiency  
1 Shprintzen-Goldberg craniosynostosis Syndrome  
1 Situs Inversus  
1 Spondyloenchondrodysplasia with Immune Dysregulation  
1 Spondyloepimetaphyseal Dysplasia; Stickler Syndrome

1 SSR4  
1 Syndactyly 3/4 fingers, polydactyly toes  
1 Tatton-Brown-Rahman Syndrome  
1 Temple Syndrome  
1 Tessier cleft  
1 Trisomy 9 mosaicism  
1 Trisomy 9p  
1 TUBA1A-related disorder  
1 UPD 14  
1 Van Maldergem syndrome 2  
1 Very-long-chain acyl-CoA dehydrogenase deficiency  
1 Williams-Beuren Syndrome; Marfan Syndrome  
1 X-Linked Hypophosphatemic Rickets  
1 X-linked Ichthyosis  
1 X-linked mutation of AMER1  
1 Xp11.4 deletion  
1 Xp22.11p11.4 Deletion; SRY+; 5p13.3 gain  
1 Xp22.31 Deletion  
1 Xp22.33 Deletion/EDS type 2  
1 Xp22.33p22.32x3  
1 Xq13.1 Duplication  
1 Xq21.1 Deletion  
1 Xq22.1 Deletion  
1 Xq22.3-q28 Deletion  
1 Xq25 Duplication  
1 Xq28 deletion syndrome, 4p partial trisomy syndrome  
1 XY/XO mosaicism  
1 Y Chromosome anomaly  
1 You-Hoover-Fong Syndrome  
1 Yp11.2-Yq11.23 Duplication
