# Supplementary material for: Automated syndrome diagnosis by three-dimensional facial imaging
Source: PubMed Central journal article supplement (PMC7521994; doi:10.1038/s41436-020-0845-y), 2020-06-01
Supplement: 41436_2020_845_MOESM4_ESM.pdf [file 41436_2020_845_MOESM4_ESM.pdf]

**File S3:** Vector maps for syndromes arranged along among-syndrome PC

Apert

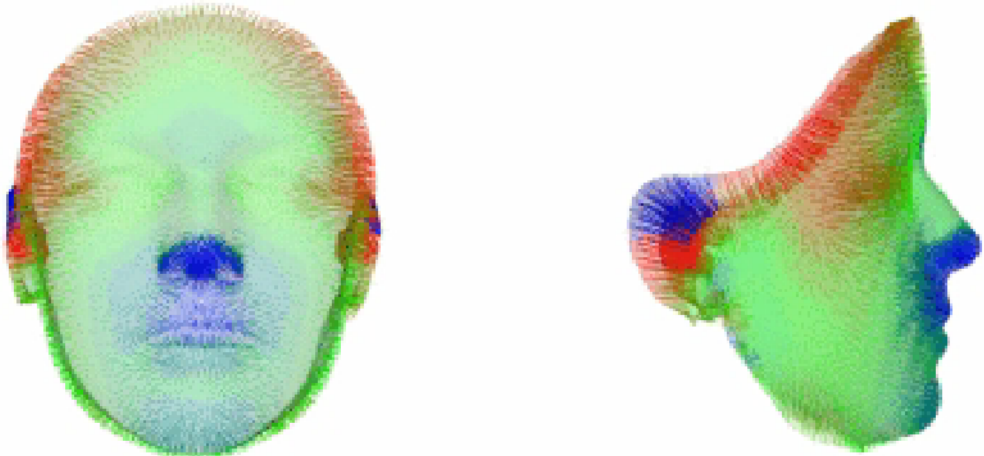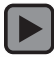

PC1 (click on image to animate)

Sotos

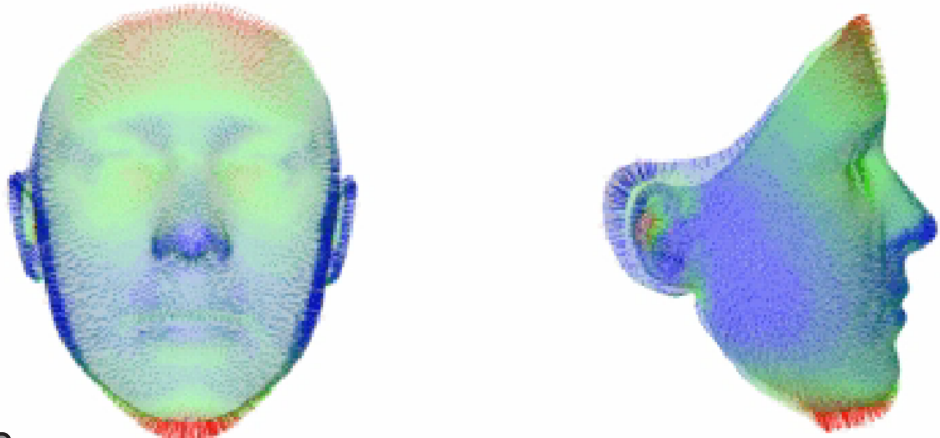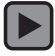

PC2 (click on image to animate)

Nager

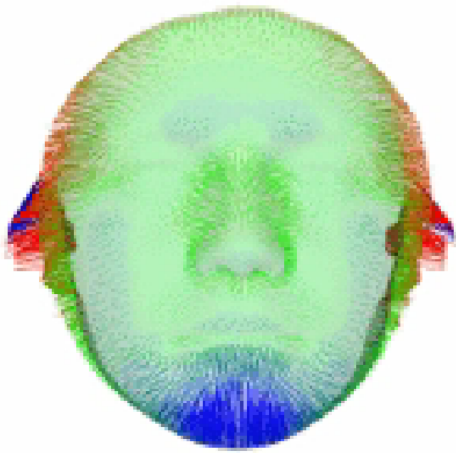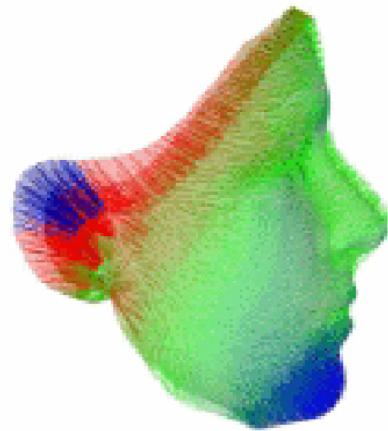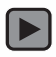

PC3 (click on image to animate)

Treacher Collins

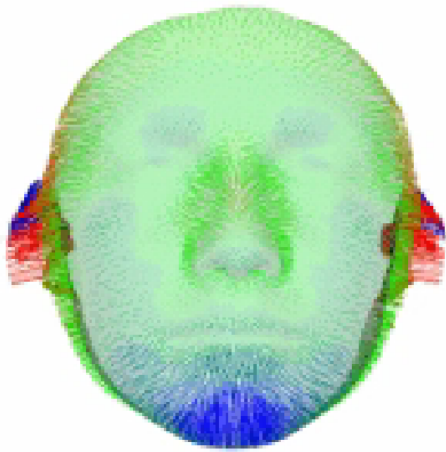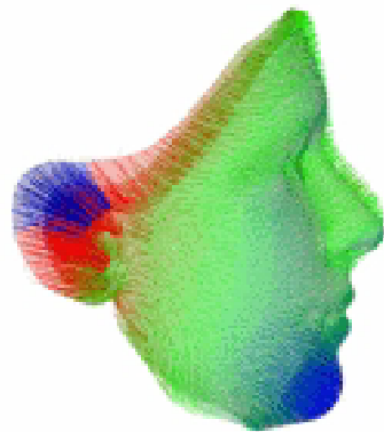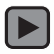

PC4 (click on image to animate)

Goltz

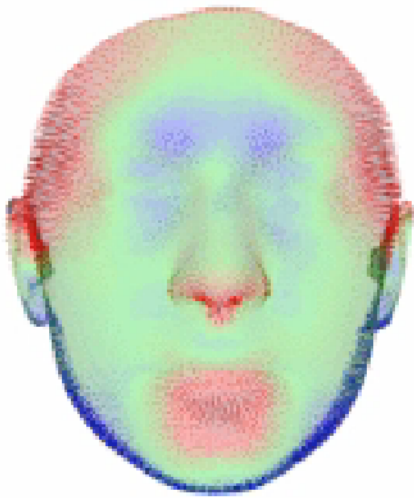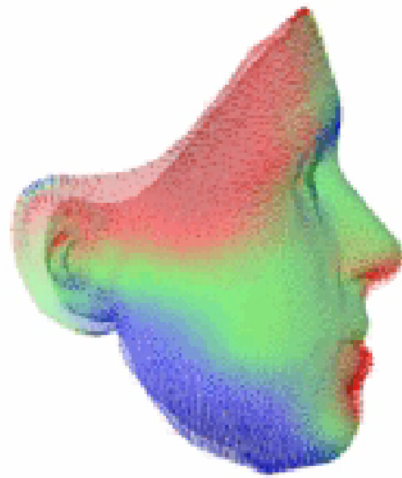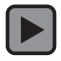

PC5 (click on image to animate)

EED CLP

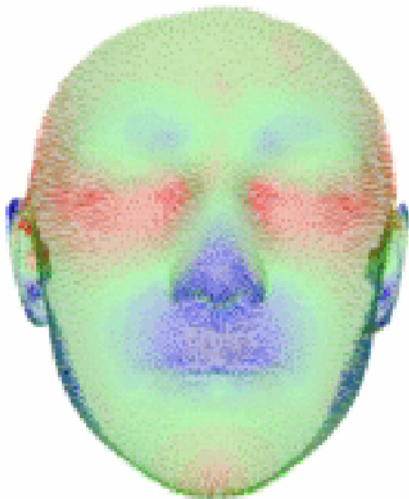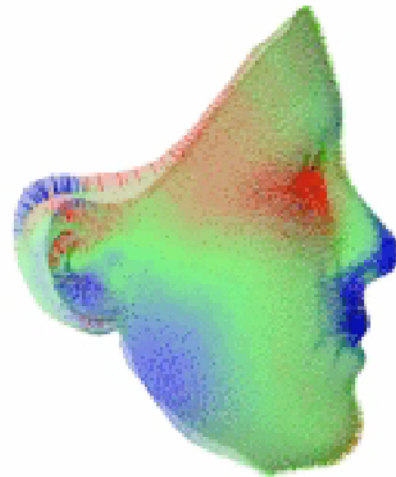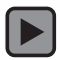

PC6 (click on image to animate)

18p Del

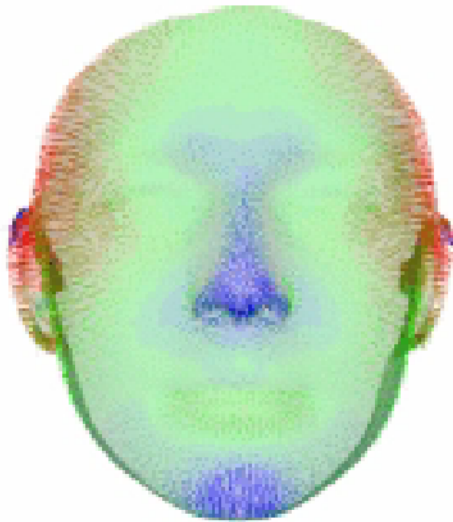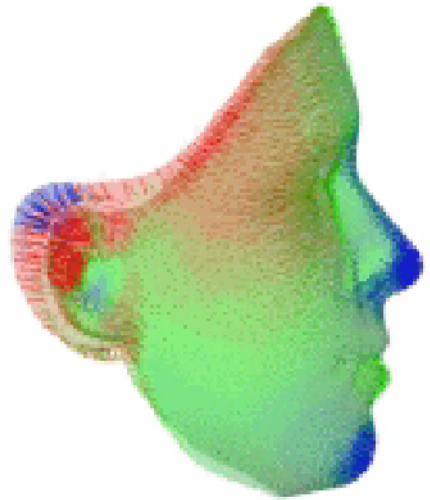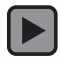

PC7 (click on image to animate)

Angelman

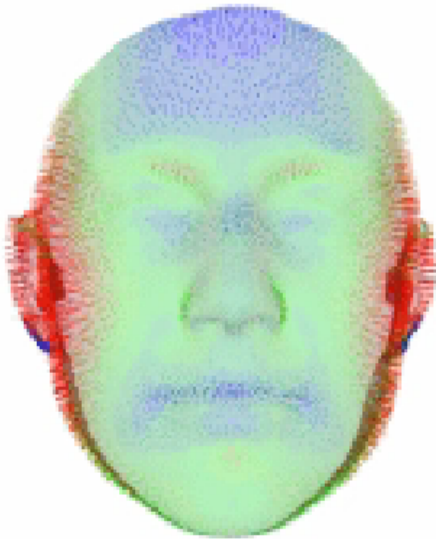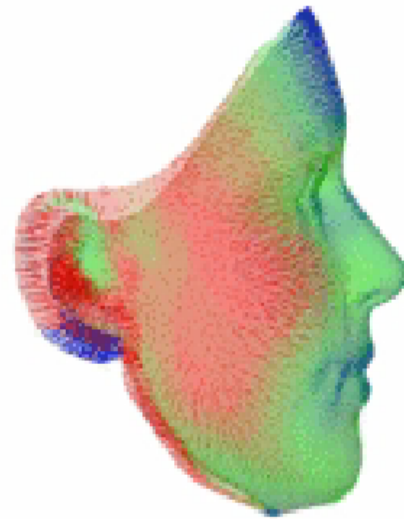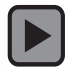

PC8 (click on image to animate)
